# Supplementary material for: COVID-19 impact on Socio-economic and Health Interventions: A Gaps and Peaks analysis using Clustering Approach
Source: bioRxiv or medRxiv preprint supplement (doi:10.1101/2022.01.09.22268991), 2022-01-10
Supplement: Supplementary file [file media-1.pdf]

# **COVID-19 impact on Socio-economic and Health Interventions: A Gaps and Peaks analysis using Clustering Approach**

Hridoy Jyoti Mahanta<sup>1, 2, \*</sup>, G. Narahari Sastry<sup>1, 2, \*</sup>

<sup>1</sup>Advanced Computation and Data Sciences Division, CSIR- North East Institute of Science and Technology, Jorhat-785006, Assam, India

<sup>2</sup>Academy of Scientific and Innovative Research (AcSIR), Ghaziabad-201002, Uttar Pradesh, India

## ***Corresponding Authors***

\*Email: [hridoy69@gmail.com](mailto:hridoy69@gmail.com), [hridoy@neist.res.in](mailto:hridoy@neist.res.in), [gnsastry@gmail.com](mailto:gnsastry@gmail.com)

## **List of Supplementary tables**

**Supplementary Table 1** Countries grouped on the basis of reaching highest intensity (number of cases) among multiple Covid-19 waves. 25 countries were found to be still in the first wave of Covid-19 and do not appear in this table.

**Supplementary Table 2** Countries grouped on the basis of their skewed distributions of the number of confirmed cases

**Supplementary Table 3** Intensities (No. confirmed of cases) during the peaks for top 120 countries with highest number of cases and deaths from February 2020 – December 2021

**Supplementary Table 4** Gaps (in terms of no. of days) between the peaks for top 120 countries with highest number of cases and deaths from February 2020 – December 2021

**Supplementary Table 5** Duration of each peak (from start to end) in terms of no. of days for top 120 countries with highest number of cases and deaths from February 2020 – December 2021

**Supplementary Table 6** Skewed distribution of each peak for top 120 countries with highest number of cases and deaths from February 2020 – December 2021

**Supplementary Table 1** Countries grouped on the basis of reaching highest intensity (number of cases) among multiple Covid-19 waves. 25 countries were found to be still in the first wave of Covid-19 and do not appear in this table.

| <b>Covid-19 waves</b>         | <b>Countries</b>                                                                                                                                                                                                                                                                                                                                                                                                                                                                                                                                  |
|-------------------------------|---------------------------------------------------------------------------------------------------------------------------------------------------------------------------------------------------------------------------------------------------------------------------------------------------------------------------------------------------------------------------------------------------------------------------------------------------------------------------------------------------------------------------------------------------|
| First wave<br>(24 Countries)  | USA, France, UK, Spain, Italy, Malaysia, Sweden, Japan, Portugal, Switzerland, Tunisia, UAE, Saudi Arabia, Ecuador, Panama, Azerbaijan, Egypt, Lithuania, Moldova, Qatar, Albania, Belize, Ghana, Malawi, North Macedonia                                                                                                                                                                                                                                                                                                                         |
| Second Wave<br>(81 Countries) | India, Russia, Turkey, Argentina, Colombia, Iran, Germany, Indonesia, Poland, Mexico, Peru, Netherlands, Czechia, Iraq, Chile, Canada, Belgium, Romania, Hungary, Nepal, Austria, Kazakhstan, Jordan, Morocco, Bolivia, Belarus, Slovakia, Costa Rica, Georgia, Kuwait, Dominican Republic, Guatemala, Palestine, Venezuela, Oman, Ethiopia, Bahrain, Slovenia, Armenia, Libya, Afghanistan, Bosnia and Herzegovina, El Salvador, Estonia, Latvia, Madagascar, Mozambique, Myanmar, Nigeria, Rwanda, Senegal, Singapore, Uganda, Zambia, Zimbabwe |
| Third wave<br>(14 Countries)  | Ukraine, Philippines, Bangladesh, Pakistan, Israel, Serbia, Greece, Bulgaria, Croatia, Algeria, Cyprus, Eswatini, Kenya, Kyrgyzstan                                                                                                                                                                                                                                                                                                                                                                                                               |
| Fourth wave<br>(1 Country)    | South Africa                                                                                                                                                                                                                                                                                                                                                                                                                                                                                                                                      |

**Supplementary Table 2** Countries grouped on the basis of their skewed distributions of the number of confirmed cases

| Skewed distribution                 | Countries                                                                                                                                                                                                                                                                                                                                                                                                                                                                                                                                                                                                                                                                                                       |
|-------------------------------------|-----------------------------------------------------------------------------------------------------------------------------------------------------------------------------------------------------------------------------------------------------------------------------------------------------------------------------------------------------------------------------------------------------------------------------------------------------------------------------------------------------------------------------------------------------------------------------------------------------------------------------------------------------------------------------------------------------------------|
| Left distributed<br>(30 Countries)  | France, Argentina, Italy, Germany, South Africa, Ukraine, Romania, Japan, Switzerland, Jordan, Panama, Kuwait, Croatia, Denmark, Bahrain, Moldova, Afghanistan, Belize, Botswana, Cambodia, China, El Salvador, Equatorial Guinea, Estonia, Eswatini, Mongolia, Myanmar, Nigeria, North Macedonia, Zimbabwe                                                                                                                                                                                                                                                                                                                                                                                                     |
| Right distributed<br>(11 Countries) | Czechia, Nepal, Greece, Slovakia, Sri Lanka, Ethiopia, Armenia, Luxembourg, Maldives, Mozambique, Namibia                                                                                                                                                                                                                                                                                                                                                                                                                                                                                                                                                                                                       |
| Mixed distributed<br>(74 Countries) | USA, India, Brazil, Russia, UK, Turkey, Colombia, Spain, Iran, Indonesia, Poland, Mexico, Peru, Netherlands, Iraq, Chile, Philippines, Canada, Bangladesh, Malaysia, Belgium, Sweden, Pakistan, Portugal, Israel, Hungary, Austria, Kazakhstan, Tunisia, Serbia, UAE, Morocco, Saudi Arabia, Lebanon, Ecuador, Bolivia, Paraguay, Belarus, Bulgaria, Costa Rica, Georgia, Thailand, Uruguay, Azerbaijan, Dominican Republic, Guatemala, Palestine, Venezuela, Oman, Egypt, Ireland, Lithuania, Honduras, Cuba, Slovenia, Qatar, Libya, Albania, Algeria, Bosnia and Herzegovina, Cameroon, Ghana, Kenya, Kyrgyzstan, Latvia, Madagascar, Malawi, Norway, South Korea, Singapore, Sudan, Uganda, Vietnam, Zambia |

**Supplementary Table 3** Intensities (No. of confirmed cases) during the peaks for top 120 countries with highest number of deaths and cases from February 2020 – December 2021

| Sl. No. | Country      | No. of Peaks | No. of waves | Wave Pattern | Peak 1 (P1) | Peak 2 (P2) | Peak 3 (P3) | Peak 4 (P4) | Peak 5 (P5) | Peak 6 (P6) | Peak 7 (P7) |
|---------|--------------|--------------|--------------|--------------|-------------|-------------|-------------|-------------|-------------|-------------|-------------|
| 1       | USA          | 6            | 2            | A            | 48312       | 65073       | 203022      | 303461      | 84337       | 255297      |             |
| 2       | India        | 4            | 2            | B            | 61242       | 81484       | 401993      | 47092       |             |             |             |
| 3       | Brazil       | 4            | 1            |              | 60713       | 87969       | 88696       | 124248      |             |             |             |
| 4       | Russia       | 4            | 2            | B            | 17987       | 26613       | 21312       | 39931       |             |             |             |
| 5       | France       | 4            | 3            | A            | 50746       | 104707      | 117900      | 27781       |             |             |             |
| 6       | UK           | 5            | 2            | A            | 4534        | 26707       | 68192       | 53980       | 51548       |             |             |
| 7       | Turkey       | 4            | 4            | B            | 5138        | 44506       | 63082       | 22332       |             |             |             |
| 8       | Argentina    | 3            | 2            | B            | 18326       | 13835       | 41080       |             |             |             |             |
| 9       | Colombia     | 4            | 2            | B            | 10284       | 21078       | 19925       | 28315       |             |             |             |
| 10      | Spain        | 4            | 2            | A            | 9630        | 55019       | 93822       | 61628       |             |             |             |
| 11      | Italy        | 3            | 2            | A            | 31756       | 26790       | 6613        |             |             |             |             |
| 12      | Iran         | 3            | 2            | B            | 13922       | 25582       | 50228       |             |             |             |             |
| 13      | Germany      | 2            | 2            | B            | 49044       | 31721       |             |             |             |             |             |
| 14      | Indonesia    | 4            | 2            | B            | 4823        | 6267        | 14518       | 39532       |             |             |             |
| 15      | Poland       | 2            | 3            | B            | 21897       | 35253       |             |             |             |             |             |
| 16      | Mexico       | 3            | 2            | B            | 9556        | 22339       | 28953       |             |             |             |             |
| 17      | South Africa | 3            | 4            | D            | 10107       | 21980       | 26485       |             |             |             |             |
| 18      | Ukraine      | 3            | 3            | C            | 15456       | 20456       | 28477       |             |             |             |             |
| 19      | Peru         | 2            | 2            | B            | 21358       | 19026       |             |             |             |             |             |
| 20      | Netherlands  | 7            | 2            | B            | 1346        | 11172       | 13072       | 9160        | 9230        | 11297       | 23714       |
| 21      | Czechia      | 2            | 2            | B            | 15663       | 16816       |             |             |             |             |             |
| 22      | Iraq         | 5            | 2            | B            | 4756        | 3701        | 4336        | 8696        | 12734       |             |             |
| 23      | Chile        | 6            | 3            | B            | 13188       | 7592        | 4959        | 7592        | 8920        | 2281        |             |

|    |              |   |   |   |       |       |       |       |       |      |  |
|----|--------------|---|---|---|-------|-------|-------|-------|-------|------|--|
| 24 | Philippines  | 3 | 3 | C | 6725  | 10002 | 8537  |       |       |      |  |
| 25 | Canada       | 5 | 3 | B | 2567  | 7828  | 10643 | 10985 | 11381 |      |  |
| 26 | Bangladesh   | 5 | 3 | C | 4014  | 3200  | 2316  | 7626  | 15989 |      |  |
| 27 | Malaysia     | 3 | 1 | A | 5728  | 9020  | 21176 |       |       |      |  |
| 28 | Belgium      | 4 | 2 | B | 23921 | 9065  | 5010  | 47836 |       |      |  |
| 29 | Sweden       | 3 | 1 | A | 32485 | 21802 | 1355  |       |       |      |  |
| 30 | Romania      | 3 | 2 | B | 10269 | 6115  | 18863 |       |       |      |  |
| 31 | Pakistan     | 6 | 3 | C | 12073 | 3306  | 4974  | 8495  | 5026  | 7727 |  |
| 32 | Japan        | 3 | 4 | A | 7957  | 7238  | 20028 |       |       |      |  |
| 33 | Portugal     | 4 | 2 | A | 1516  | 8371  | 16432 | 4376  |       |      |  |
| 34 | Israel       | 3 | 3 | C | 9078  | 11934 | 22291 |       |       |      |  |
| 35 | Hungary      | 3 | 3 | B | 6697  | 11265 | 27830 |       |       |      |  |
| 36 | Switzerland  | 4 | 2 | A | 1163  | 21926 | 5583  | 12801 |       |      |  |
| 37 | Nepal        | 3 | 2 | B | 5743  | 5657  | 3194  |       |       |      |  |
| 38 | Austria      | 3 | 2 | B | 9586  | 3895  | 15809 |       |       |      |  |
| 39 | Kazakhstan   | 3 | 2 | B | 18757 | 3856  | 66121 |       |       |      |  |
| 40 | Tunisia      | 4 | 1 | A | 5752  | 4170  | 1847  | 9823  |       |      |  |
| 41 | Jordan       | 2 | 3 | B | 7933  | 9535  |       |       |       |      |  |
| 42 | Serbia       | 4 | 3 | C | 7780  | 9983  | 8467  | 7111  |       |      |  |
| 43 | UAE          | 4 | 1 | A | 1578  | 3966  | 4471  | 985   |       |      |  |
| 44 | Morocco      | 3 | 2 | B | 6195  | 740   | 12039 |       |       |      |  |
| 45 | Saudi Arabia | 4 | 2 | A | 4919  | 473   | 270   | 5439  |       |      |  |
| 46 | Lebanon      | 3 | 1 |   | 6154  | 3562  | 2591  |       |       |      |  |
| 47 | Ecuador      | 5 | 2 | A | 11536 | 2249  | 3942  | 5913  | 4953  |      |  |
| 48 | Bolivia      | 3 | 2 | B | 2031  | 2866  | 7072  |       |       |      |  |
| 49 | Greece       | 3 | 3 | C | 3316  | 4322  | 4327  |       |       |      |  |
| 50 | Paraguay     | 3 | 1 |   | 1162  | 3836  | 3481  |       |       |      |  |
| 51 | Belarus      | 4 | 2 | B | 1691  | 1799  | 1756  | 1862  |       |      |  |

|    |                    |   |   |   |       |       |       |       |       |  |  |
|----|--------------------|---|---|---|-------|-------|-------|-------|-------|--|--|
| 52 | Bulgaria           | 3 | 3 | C | 4828  | 5176  | 6816  |       |       |  |  |
| 53 | Panama             | 3 | 2 | A | 1420  | 5186  | 1249  |       |       |  |  |
| 54 | Slovakia           | 2 | 2 | B | 11915 | 6103  |       |       |       |  |  |
| 55 | Costa Rica         | 4 | 2 | B | 1907  | 2772  | 5992  | 6952  |       |  |  |
| 56 | Georgia            | 4 | 2 | B | 5450  | 1792  | 6208  | 5739  |       |  |  |
| 57 | Kuwait             | 4 | 2 | B | 900   | 903   | 1716  | 1993  |       |  |  |
| 58 | Thailand           | 4 | 1 |   | 9635  | 18912 | 20533 | 16130 |       |  |  |
| 59 | Uruguay            | 2 | 1 |   | 4213  | 315   |       |       |       |  |  |
| 60 | Croatia            | 3 | 3 | C | 4620  | 3217  | 7315  |       |       |  |  |
| 61 | Azerbaijan         | 3 | 3 | A | 4451  | 2237  | 7319  |       |       |  |  |
| 62 | Dominican Republic | 3 | 4 | B | 2370  | 1765  | 1248  |       |       |  |  |
| 63 | Guatemala          | 3 | 2 | B | 1739  | 2013  | 5826  |       |       |  |  |
| 64 | Palestine          | 5 | 3 | B | 2516  | 1703  | 2884  | 2466  | 30356 |  |  |
| 65 | Denmark            | 3 | 1 |   | 4508  | 2007  | 1036  |       |       |  |  |
| 66 | Venezuela          | 4 | 2 | B | 1008  | 673   | 1348  | 2850  |       |  |  |
| 67 | Oman               | 4 | 2 | B | 2164  | 2685  | 3544  | 5517  |       |  |  |
| 68 | Egypt              | 5 | 3 | A | 1503  | 1418  | 1021  | 956   | 741   |  |  |
| 69 | Ireland            | 3 | 1 |   | 1284  | 8227  | 1501  |       |       |  |  |
| 70 | Sri Lanka          | 2 | 1 |   | 3623  | 9912  |       |       |       |  |  |
| 71 | Lithuania          | 3 | 2 | A | 3984  | 1522  | 3622  |       |       |  |  |
| 72 | Honduras           | 4 | 1 |   | 1087  | 1386  | 2720  | 4043  |       |  |  |
| 73 | Ethiopia           | 2 | 2 | B | 1829  | 2173  |       |       |       |  |  |
| 74 | Bahrain            | 2 | 2 | B | 3273  | 139   |       |       |       |  |  |
| 75 | Cuba               | 3 | 1 |   | 1051  | 9323  | 5049  |       |       |  |  |
| 76 | Slovenia           | 3 | 2 | B | 3354  | 1526  | 4521  |       |       |  |  |
| 77 | Moldova            | 3 | 2 | A | 1766  | 2273  | 2068  |       |       |  |  |
| 78 | Armenia            | 2 | 4 | B | 2474  | 1257  |       |       |       |  |  |

|     |                   |   |   |   |       |      |      |      |  |  |  |
|-----|-------------------|---|---|---|-------|------|------|------|--|--|--|
| 79  | Qatar             | 4 | 2 | A | 1901  | 273  | 650  | 306  |  |  |  |
| 80  | Libya             | 3 | 2 | B | 1639  | 1350 | 4061 |      |  |  |  |
| 81  | Afghanistan       | 2 | 2 | B | 377   | 1940 |      |      |  |  |  |
| 82  | Albania           | 3 | 2 | A | 892   | 1054 | 1131 |      |  |  |  |
| 83  | Algeria           | 4 | 3 | C | 953   | 459  | 286  | 1927 |  |  |  |
| 84  | Belize            | 2 | 2 | A | 25    | 815  |      |      |  |  |  |
| 85  | Bosnia            | 4 | 3 | B | 1921  | 3755 | 1722 | 2512 |  |  |  |
| 86  | Botswana          | 2 | 1 |   | 2356  | 8530 |      |      |  |  |  |
| 87  | Cambodia          | 1 | 1 |   | 978   |      |      |      |  |  |  |
| 88  | Cameroon          | 3 | 1 |   | 1183  | 632  | 9668 |      |  |  |  |
| 89  | China             | 1 | 1 |   | 15133 |      |      |      |  |  |  |
| 90  | Cyprus            | 0 | 3 | C |       |      |      |      |  |  |  |
| 91  | El Salvador       | 1 | 2 | B | 2324  |      |      |      |  |  |  |
| 92  | Equatorial Guinea | 2 | 1 |   | 1750  | 742  |      |      |  |  |  |
| 93  | Estonia           | 2 | 2 | B | 1956  | 2300 |      |      |  |  |  |
| 94  | Eswatini          | 1 | 3 | C | 1068  |      |      |      |  |  |  |
| 95  | Fiji              | 0 | 1 |   |       |      |      |      |  |  |  |
| 96  | Ghana             | 3 | 3 | A | 1385  | 655  | 1583 |      |  |  |  |
| 97  | Kenya             | 3 | 4 | C | 1554  | 2008 | 1974 |      |  |  |  |
| 98  | Kyrgyzstan        | 3 | 3 | C | 1030  | 1965 | 954  |      |  |  |  |
| 99  | Latvia            | 3 | 2 | B | 1861  | 1036 | 3206 |      |  |  |  |
| 100 | Luxembourg        | 3 | 1 |   | 1967  | 608  | 398  |      |  |  |  |
| 101 | Madagascar        | 2 | 2 | B | 859   | 712  |      |      |  |  |  |
| 102 | Malawi            | 1 | 2 | A | 1316  |      |      |      |  |  |  |
| 103 | Maldives          | 1 | 1 |   | 2194  |      |      |      |  |  |  |
| 104 | Mongolia          | 2 | 1 |   | 2527  | 7394 |      |      |  |  |  |
| 105 | Mozambique        | 1 | 2 | B | 1611  |      |      |      |  |  |  |
| 106 | Myanmar           | 2 | 2 | B | 1527  | 7083 |      |      |  |  |  |



|     |                 |   |   |   |       |       |      |      |      |  |  |
|-----|-----------------|---|---|---|-------|-------|------|------|------|--|--|
| 107 | Namibia         | 1 | 1 |   | 3268  |       |      |      |      |  |  |
| 108 | Nigeria         | 2 | 3 | B | 1634  | 1823  |      |      |      |  |  |
| 109 | North Macedonia | 4 | 2 | A | 1402  | 1511  | 1250 | 677  |      |  |  |
| 110 | Norway          | 4 | 1 |   | 1680  | 935   | 1150 | 1785 |      |  |  |
| 111 | Rwanda          | 1 | 2 | B | 595   |       |      |      |      |  |  |
| 112 | S.Korea         | 4 | 1 |   | 1237  | 797   | 1896 | 3270 |      |  |  |
| 113 | Senegal         | 0 | 2 | B |       |       |      |      |      |  |  |
| 114 | Seychelles      | 0 | 1 |   |       |       |      |      |      |  |  |
| 115 | Singapore       | 5 | 2 | B | 1426  | 908   | 58   | 45   | 2478 |  |  |
| 116 | Sudan           | 2 | 2 | A | 1099  | 390   |      |      |      |  |  |
| 117 | Uganda          | 2 | 2 | B | 1859  | 1735  |      |      |      |  |  |
| 118 | Vietnam         | 2 | 1 |   | 17428 | 39132 |      |      |      |  |  |
| 119 | Zambia          | 2 | 2 | B | 1796  | 3594  |      |      |      |  |  |
| 120 | Zimbabwe        | 2 | 2 | B | 1365  | 3110  |      |      |      |  |  |

**Supplementary Table 4** Gaps (in terms of no. of days) between the peaks for top 120 countries with highest number of deaths and cases from February 2020 – December 2021

| Sl. No. | Country      | No. of peaks | $\Delta G_1 = T_{P2} - T_{P1}$ | $\Delta G_2 = T_{P3} - T_{P2}$ | $\Delta G_3 = T_{P4} - T_{P3}$ | $\Delta G_4 = T_{P5} - T_{P4}$ | $\Delta G_3 = T_{P4} - T_{P3}$ | $\Delta G_4 = T_{P5} - T_{P4}$ |
|---------|--------------|--------------|--------------------------------|--------------------------------|--------------------------------|--------------------------------|--------------------------------|--------------------------------|
| 1       | USA          | 6            | 184                            | 62                             | 89                             | 89                             | 123                            |                                |
| 2       | India        | 4            | 92                             | 181                            | 153                            |                                |                                |                                |
| 3       | Brazil       | 4            | 153                            | 89                             | 61                             |                                |                                |                                |
| 4       | Russia       | 4            | 92                             | 150                            | 123                            |                                |                                |                                |
| 5       | France       | 4            | 214                            | 151                            | 123                            |                                |                                |                                |
| 6       | UK           | 5            | 153                            | 92                             | 181                            | 91                             |                                |                                |
| 7       | Turkey       | 4            | 153                            | 251                            | 92                             |                                |                                |                                |
| 8       | Argentina    | 3            | 92                             | 120                            |                                |                                |                                |                                |
| 9       | Colombia     | 4            | 215                            | 89                             | 122                            |                                |                                |                                |
| 10      | Spain        | 4            | 213                            | 61                             | 183                            |                                |                                |                                |
| 11      | Italy        | 3            | 151                            | 61                             |                                |                                |                                |                                |
| 12      | Iran         | 3            | 120                            | 245                            |                                |                                |                                |                                |
| 13      | Germany      | 2            | 120                            |                                |                                |                                |                                |                                |
| 14      | Indonesia    | 4            | 61                             | 62                             | 212                            |                                |                                |                                |
| 15      | Poland       | 2            | 181                            |                                |                                |                                |                                |                                |
| 16      | Mexico       | 3            | 150                            | 212                            |                                |                                |                                |                                |
| 17      | South Africa | 3            | 153                            | 181                            |                                |                                |                                |                                |
| 18      | Ukraine      | 3            | 120                            | 214                            |                                |                                |                                |                                |
| 19      | Peru         | 2            | 212                            |                                |                                |                                |                                |                                |
| 20      | Netherlands  | 7            | 184                            | 61                             | 90                             | 61                             | 61                             | 122                            |
| 21      | Czechia      | 2            | 151                            |                                |                                |                                |                                |                                |
| 22      | Iraq         | 5            | 61                             | 89                             | 61                             | 123                            |                                |                                |
| 23      | Chile        | 6            | 122                            | 123                            | 59                             | 91                             | 122                            |                                |

|    |              |   |     |     |     |     |    |  |
|----|--------------|---|-----|-----|-----|-----|----|--|
| 24 | Philippines  | 3 | 212 | 214 |     |     |    |  |
| 25 | Canada       | 5 | 214 | 61  | 120 | 122 |    |  |
| 26 | Bangladesh   | 5 | 61  | 122 | 120 | 123 |    |  |
| 27 | Malaysia     | 3 | 120 | 61  |     |     |    |  |
| 28 | Belgium      | 4 | 151 | 153 | 91  |     |    |  |
| 29 | Sweden       | 3 | 120 | 121 |     |     |    |  |
| 30 | Romania      | 3 | 151 | 184 |     |     |    |  |
| 31 | Pakistan     | 6 | 153 | 121 | 61  | 61  | 61 |  |
| 32 | Japan        | 3 | 120 | 122 |     |     |    |  |
| 33 | Portugal     | 4 | 214 | 61  | 181 |     |    |  |
| 34 | Israel       | 3 | 123 | 222 |     |     |    |  |
| 35 | Hungary      | 3 | 90  | 244 |     |     |    |  |
| 36 | Switzerland  | 4 | 214 | 151 | 153 |     |    |  |
| 37 | Nepal        | 3 | 181 | 123 |     |     |    |  |
| 38 | Austria      | 3 | 121 | 244 |     |     |    |  |
| 39 | Kazakhstan   | 3 | 304 | 62  |     |     |    |  |
| 40 | Tunisia      | 4 | 92  | 59  | 122 |     |    |  |
| 41 | Jordan       | 2 | 121 |     |     |     |    |  |
| 42 | Serbia       | 4 | 121 | 183 |     |     |    |  |
| 43 | UAE          | 4 | 92  | 150 | 92  |     |    |  |
| 44 | Morroco      | 3 | 151 | 123 |     |     |    |  |
| 45 | Saudi Arabia | 4 | 153 | 90  | 112 |     |    |  |
| 46 | Lebanon      | 3 | 89  | 123 |     |     |    |  |
| 47 | Ecuador      | 5 | 153 | 123 | 89  | 71  |    |  |
| 48 | Bolivia      | 3 | 153 | 150 |     |     |    |  |
| 49 | Greece       | 3 | 121 | 122 |     |     |    |  |
| 50 | Paraguay     | 3 | 89  | 61  |     |     |    |  |

|    |                    |   |     |     |     |    |  |  |
|----|--------------------|---|-----|-----|-----|----|--|--|
| 51 | Belarus            | 4 | 90  | 92  | 92  |    |  |  |
| 52 | Bulgaria           | 3 | 121 | 183 |     |    |  |  |
| 53 | Panama             | 3 | 153 | 150 |     |    |  |  |
| 54 | Slovakia           | 2 | 90  |     |     |    |  |  |
| 55 | Costa Rica         | 4 | 92  | 151 | 122 |    |  |  |
| 56 | Georgia            | 4 | 120 | 123 | 61  |    |  |  |
| 57 | Kuwait             | 4 | 61  | 121 | 122 |    |  |  |
| 58 | Thailand           | 4 | 61  | 60  |     |    |  |  |
| 59 | Uruguay            | 2 | 123 |     |     |    |  |  |
| 60 | Croatia            | 3 | 120 | 214 |     |    |  |  |
| 61 | Azerbaijan         | 3 | 90  | 183 |     |    |  |  |
| 62 | Dominican Republic | 3 | 120 | 169 |     |    |  |  |
| 63 | Guatemala          | 3 | 89  | 123 |     |    |  |  |
| 64 | Palestine          | 5 | 60  | 61  | 122 | 62 |  |  |
| 65 | Denmark            | 3 | 90  | 91  |     |    |  |  |
| 66 | Venezuela          | 4 | 92  | 59  | 183 |    |  |  |
| 67 | Oman               | 4 | 92  | 181 | 61  |    |  |  |
| 68 | Egypt              | 5 | 153 | 120 | 61  |    |  |  |
| 69 | Ireland            | 3 | 92  | 181 |     |    |  |  |
| 70 | Sri Lanka          | 2 | 92  |     |     |    |  |  |
| 71 | Lithuania          | 3 | 151 | 153 |     |    |  |  |
| 72 | Honduras           | 4 | 123 | 89  | 123 |    |  |  |
| 73 | Ethiopia           | 2 | 212 |     |     |    |  |  |
| 74 | Bahrain            | 2 | 122 |     |     |    |  |  |
| 75 | Cuba               | 3 | 122 | 92  |     |    |  |  |
| 76 | Slovenia           | 3 | 89  | 214 |     |    |  |  |
| 77 | Moldova            | 3 | 90  | 214 |     |    |  |  |

|     |                        |   |     |     |    |  |  |  |
|-----|------------------------|---|-----|-----|----|--|--|--|
| 78  | Armenia                | 2 | 151 |     |    |  |  |  |
| 79  | Qatar                  | 4 | 123 | 212 | 92 |  |  |  |
| 80  | Libya                  | 3 | 181 | 92  |    |  |  |  |
| 81  | Afghanistan            | 2 | 243 |     |    |  |  |  |
| 82  | Albania                | 3 | 153 |     |    |  |  |  |
| 83  | Algeria                | 4 | 59  | 61  | 92 |  |  |  |
| 84  | Belize                 | 2 | 184 |     |    |  |  |  |
| 85  | Bosnia and Herzegovina | 4 | 120 | 184 | 61 |  |  |  |
| 86  | Botswana               | 2 | 153 |     |    |  |  |  |
| 87  | Cambodia               | 1 |     |     |    |  |  |  |
| 88  | Cameroon               | 3 | 152 | 152 |    |  |  |  |
| 89  | China                  | 1 |     |     |    |  |  |  |
| 90  | Cyprus                 | 0 |     |     |    |  |  |  |
| 91  | El Salvador            | 1 |     |     |    |  |  |  |
| 92  | Equatorial Guinea      | 2 | 304 |     |    |  |  |  |
| 93  | Estonia                | 2 | 244 |     |    |  |  |  |
| 94  | Eswatini               | 1 |     |     |    |  |  |  |
| 95  | Fiji                   | 0 |     |     |    |  |  |  |
| 96  | Ghana                  | 3 | 122 | 62  |    |  |  |  |
| 97  | Kenya                  | 3 | 121 | 153 |    |  |  |  |
| 98  | Kyrgyzstan             | 3 | 122 | 182 | 61 |  |  |  |
| 99  | Latvia                 | 3 | 150 | 153 |    |  |  |  |
| 100 | Luxembourg             | 3 | 121 | 122 |    |  |  |  |
| 101 | Madagascar             | 2 | 184 |     |    |  |  |  |
| 102 | Malawi                 | 1 | 181 |     |    |  |  |  |
| 103 | Maldives               | 1 |     |     |    |  |  |  |
| 104 | Mongolia               | 2 | 253 |     |    |  |  |  |

|     |                 |   |     |      |     |    |  |
|-----|-----------------|---|-----|------|-----|----|--|
| 105 | Mozambique      | 1 |     |      |     |    |  |
| 106 | Myanmar         | 2 | 212 |      |     |    |  |
| 107 | Namibia         | 1 | -21 |      |     |    |  |
| 108 | Nigeria         | 2 | 183 |      |     |    |  |
| 109 | North Macedonia | 4 | 120 | 153  | 91  |    |  |
| 110 | Norway          | 4 | 62  | 59   | 153 |    |  |
| 111 | Rwanda          | 1 |     |      |     |    |  |
| 112 | South Korea     | 4 | 89  | 92   | 61  |    |  |
| 113 | Senegal         | 0 |     |      |     |    |  |
| 114 | Seychelles      | 0 |     |      |     |    |  |
| 115 | Singapore       | 5 | 123 | 153  | 89  | 91 |  |
| 116 | Sudan           | 2 | 120 | -203 |     |    |  |
| 117 | Uganda          | 2 | 181 |      |     |    |  |
| 118 | Vietnam         | 2 | 91  |      |     |    |  |
| 119 | Zambia          | 2 | 150 |      |     |    |  |
| 120 | Zimbabwe        | 2 | 181 |      |     |    |  |

**Supplementary Table 5** Duration of each peak (from start to end) in terms of no. of days for top 120 countries with highest number of deaths and cases from February 2020 – December 2021

| Sl. No. | Country      | No. of peaks | $\delta_1 = L_2 - L_1$ | $\delta_2 = L_3 - L_2$ | $\delta_3 = L_4 - L_3$ | $\delta_4 = L_5 - L_4$ | $\delta_5 = L_6 - L_5$ | $\delta_6 = L_7 - L_6$ | $\delta_6 = L_8 - L_7$ |
|---------|--------------|--------------|------------------------|------------------------|------------------------|------------------------|------------------------|------------------------|------------------------|
| 1       | USA          | 6            | 183                    | 92                     | 90                     | 122                    | 123                    | 61                     |                        |
| 2       | India        | 4            | 183                    | 151                    | 123                    | 153                    |                        |                        |                        |
| 3       | Brazil       | 4            | 214                    | 120                    | 92                     | 245                    |                        |                        |                        |
| 4       | Russia       | 4            | 245                    | 120                    | 123                    | 153                    |                        |                        |                        |
| 5       | France       | 4            | 61                     | 214                    | 181                    | 184                    |                        |                        |                        |
| 6       | UK           | 5            | 122                    | 122                    | 182                    | 123                    | 122                    |                        |                        |
| 7       | Turkey       | 4            | 122                    | 212                    | 122                    | 185                    |                        |                        |                        |
| 8       | Argentina    | 3            | 184                    | 59                     | 306                    |                        |                        |                        |                        |
| 9       | Colombia     | 4            | 122                    | 182                    | 91                     | 184                    |                        |                        |                        |
| 10      | Spain        | 4            | 275                    | 184                    | 181                    | 123                    |                        |                        |                        |
| 11      | Italy        | 3            | 214                    | 151                    | 122                    |                        |                        |                        |                        |
| 12      | Iran         | 3            | 306                    | 150                    | 215                    |                        |                        |                        |                        |
| 13      | Germany      | 2            | 334                    | 94                     |                        |                        |                        |                        |                        |
| 14      | Indonesia    | 4            | 123                    | 61                     | 151                    | 214                    |                        |                        |                        |
| 15      | Poland       | 2            | 123                    | 212                    |                        |                        |                        |                        |                        |
| 16      | Mexico       | 3            | 153                    | 274                    | 153                    |                        |                        |                        |                        |
| 17      | South Africa | 3            | 153                    | 181                    | 215                    |                        |                        |                        |                        |
| 18      | Ukraine      | 3            | 215                    | 212                    | 122                    |                        |                        |                        |                        |
| 19      | Peru         | 2            | 214                    | 274                    | 92                     |                        |                        |                        |                        |
| 20      | Netherlands  | 7            | 153                    | 91                     | 90                     | 61                     | 61                     | 62                     | 122                    |
| 21      | Czechia      | 2            | 151                    | 154                    |                        |                        |                        |                        |                        |
| 22      | Iraq         | 5            | 92                     | 121                    | 59                     | 92                     | 153                    |                        |                        |
| 23      | Chile        | 6            | 123                    | 91                     | 90                     | 61                     | 153                    | 92                     |                        |

|    |              |   |     |     |     |     |     |     |  |
|----|--------------|---|-----|-----|-----|-----|-----|-----|--|
| 24 | Philippines  | 3 | 214 | 243 | 153 |     |     |     |  |
| 25 | Canada       | 5 | 91  | 184 | 59  | 184 | 96  |     |  |
| 26 | Bangladesh   | 5 | 61  | 92  | 119 | 123 | 214 |     |  |
| 27 | Malaysia     | 3 | 151 | 91  | 62  | 91  |     |     |  |
| 28 | Belgium      | 4 | 334 | 153 | 92  | 92  |     |     |  |
| 29 | Sweden       | 3 | 243 | 152 | 152 |     |     |     |  |
| 30 | Romania      | 3 | 212 | 123 | 153 |     |     |     |  |
| 31 | Pakistan     | 6 | 153 | 151 | 61  | 61  | 62  | 122 |  |
| 32 | Japan        | 3 | 243 | 122 | 153 |     |     |     |  |
| 33 | Portugal     | 4 | 91  | 184 | 151 | 92  | 92  |     |  |
| 34 | Israel       | 3 | 275 | 213 | 122 |     |     |     |  |
| 35 | Hungary      | 3 | 123 | 151 | 153 |     |     |     |  |
| 36 | Switzerland  | 4 | 91  | 243 | 153 | 91  |     |     |  |
| 37 | Nepal        | 3 | 181 | 152 | 153 |     |     |     |  |
| 38 | Austria      | 3 | 365 | 123 | 153 |     |     |     |  |
| 39 | Kazakhstan   | 3 | 184 | 181 | 62  |     |     |     |  |
| 40 | Tunisia      | 4 | 92  | 59  | 92  | 92  |     |     |  |
| 41 | Jordan       | 2 | 123 | 181 |     |     |     |     |  |
| 42 | Serbia       | 4 | 92  | 150 | 123 |     |     |     |  |
| 43 | UAE          | 4 | 61  | 151 | 123 | 123 |     |     |  |
| 44 | Morroco      | 3 | 243 | 92  | 153 |     |     |     |  |
| 45 | Saudi Arabia | 4 | 184 | 61  | 90  | 122 |     |     |  |
| 46 | Lebanon      | 3 | 151 | 153 | 122 |     |     |     |  |
| 47 | Ecuador      | 5 | 113 | 122 | 90  | 61  | 132 |     |  |
| 48 | Bolivia      | 3 | 153 | 121 | 153 |     |     |     |  |
| 49 | Greece       | 3 | 92  | 150 | 62  |     |     |     |  |
| 50 | Paraguay     | 3 | 151 | 92  | 92  |     |     |     |  |
| 51 | Belarus      | 4 | 61  | 90  | 122 | 122 |     |     |  |



|    |                    |   |     |     |     |     |     |  |  |
|----|--------------------|---|-----|-----|-----|-----|-----|--|--|
| 52 | Bulgaria           | 3 | 92  | 150 | 151 |     |     |  |  |
| 53 | Panama             | 3 | 92  | 123 | 212 |     |     |  |  |
| 54 | Slovakia           | 2 | 151 | 122 |     |     |     |  |  |
| 55 | Costa Rica         | 4 | 61  | 120 | 153 | 153 |     |  |  |
| 56 | Georgia            | 4 | 151 | 92  | 92  | 92  |     |  |  |
| 57 | Kuwait             | 4 | 153 | 61  | 120 | 123 |     |  |  |
| 58 | Thailand           | 4 | 150 | 123 | 61  | 61  |     |  |  |
| 59 | Uruguay            | 2 | 181 | 91  |     |     |     |  |  |
| 60 | Croatia            | 3 | 120 | 184 | 153 |     |     |  |  |
| 61 | Azerbaijan         | 3 | 120 | 153 | 184 |     |     |  |  |
| 62 | Dominican Republic | 3 | 243 | 153 | 122 |     |     |  |  |
| 63 | Guatemala          | 3 | 212 | 123 | 214 |     |     |  |  |
| 64 | Palestine          | 5 | 62  | 59  | 153 | 60  | 61  |  |  |
| 65 | Denmark            | 3 | 120 | 61  | 123 |     |     |  |  |
| 66 | Venezuela          | 4 | 91  | 90  | 61  | 244 |     |  |  |
| 67 | Oman               | 4 | 92  | 122 | 151 | 92  |     |  |  |
| 68 | Egypt              | 5 | 122 | 183 | 61  | 61  | 153 |  |  |
| 69 | Ireland            | 3 | 214 | 182 | 92  |     |     |  |  |
| 70 | Sri Lanka          | 2 | 92  | 122 |     |     |     |  |  |
| 71 | Lithuania          | 3 | 151 | 153 | 153 |     |     |  |  |
| 72 | Honduras           | 4 | 123 | 151 | 92  | 214 |     |  |  |
| 73 | Ethiopia           | 2 | 141 | 212 |     |     |     |  |  |
| 74 | Bahrain            | 2 | 122 | 92  |     |     |     |  |  |
| 75 | Cuba               | 3 | 90  | 123 | 92  |     |     |  |  |
| 76 | Slovenia           | 3 | 151 | 153 | 153 |     |     |  |  |
| 77 | Moldova            | 3 | 123 | 181 | 184 |     |     |  |  |
| 78 | Armenia            | 2 | 138 | 184 |     |     |     |  |  |
| 79 | Qatar              | 4 | 122 | 92  | 212 | 153 |     |  |  |

|     |                        |   |     |     |     |    |  |  |  |
|-----|------------------------|---|-----|-----|-----|----|--|--|--|
| 80  | Libya                  | 3 | 92  | 181 | 62  |    |  |  |  |
| 81  | Afghanistan            | 2 | 212 | 306 |     |    |  |  |  |
| 82  | Albania                | 3 | 120 | 123 |     |    |  |  |  |
| 83  | Algeria                | 4 | 62  | 59  | 91  | 62 |  |  |  |
| 84  | Belize                 | 2 | 141 | 115 |     |    |  |  |  |
| 85  | Bosnia and Herzegovina | 4 | 61  | 153 | 92  | 61 |  |  |  |
| 86  | Botswana               | 2 | 181 | 184 |     |    |  |  |  |
| 87  | Cambodia               | 1 | 62  |     |     |    |  |  |  |
| 88  | Cameroon               | 3 | 139 | 61  | 212 |    |  |  |  |
| 89  | China                  | 1 | 34  |     |     |    |  |  |  |
| 90  | Cyprus                 | 0 |     |     |     |    |  |  |  |
| 91  | El Salvador            | 1 | 214 |     |     |    |  |  |  |
| 92  | Equatorial Guinea      | 2 | 122 | 304 |     |    |  |  |  |
| 93  | Estonia                | 2 | 181 | 184 |     |    |  |  |  |
| 94  | Eswatini               | 1 | 47  |     |     |    |  |  |  |
| 95  | Fiji                   | 0 |     |     |     |    |  |  |  |
| 96  | Ghana                  | 3 | 123 | 61  | 182 |    |  |  |  |
| 97  | Kenya                  | 3 | 92  | 90  | 183 |    |  |  |  |
| 98  | Kyrgyzstan             | 3 | 212 | 153 | 153 |    |  |  |  |
| 99  | Latvia                 | 3 | 106 | 153 | 153 |    |  |  |  |
| 100 | Luxembourg             | 3 | 92  | 150 | 62  |    |  |  |  |
| 101 | Madagascar             | 2 | 184 | 61  |     |    |  |  |  |
| 102 | Malawi                 | 1 | 137 | 87  |     |    |  |  |  |
| 103 | Maldives               | 1 | 114 |     |     |    |  |  |  |
| 104 | Mongolia               | 2 | 58  | 92  |     |    |  |  |  |
| 105 | Mozambique             | 1 | 132 |     |     |    |  |  |  |
| 106 | Myanmar                | 2 | 151 | 153 |     |    |  |  |  |
| 107 | Namibia                | 1 |     |     |     |    |  |  |  |

|     |                 |   |     |     |      |    |    |  |  |
|-----|-----------------|---|-----|-----|------|----|----|--|--|
| 108 | Nigeria         | 2 | 120 | 183 |      |    |    |  |  |
| 109 | North Macedonia | 4 | 120 | 153 | 106  | 51 |    |  |  |
| 110 | Norway          | 4 | 45  | 59  | 153  | 92 |    |  |  |
| 111 | Rwanda          | 1 | 91  |     |      |    |    |  |  |
| 112 | South Korea     | 4 | 31  | 89  | 123  | 61 |    |  |  |
| 113 | Senegal         | 0 |     |     |      |    |    |  |  |
| 114 | Seychelles      | 0 |     |     |      |    |    |  |  |
| 115 | Singapore       | 5 | 102 | 93  | 151  | 91 | 62 |  |  |
| 116 | Sudan           | 2 | 22  | 53  | -234 |    |    |  |  |
| 117 | Uganda          | 2 | 23  | 243 |      |    |    |  |  |
| 118 | Vietnam         | 2 | 92  | 61  |      |    |    |  |  |
| 119 | Zambia          | 2 | 24  | 212 |      |    |    |  |  |
| 120 | Zimbabwe        | 2 | 86  | 244 |      |    |    |  |  |

**Supplementary Table 6** Skewed distribution of each peak for top 120 countries with highest number of cases and deaths from February 2020 – December 2021

| Sl. No. | Country | No. of waves | No. of Peaks | Peaks | $\sigma_L$ | $\sigma_R$ | $T_L$      | $T_R$      | AUC <sub>L</sub> | AUC <sub>R</sub> | $\gamma$   | Peak Distribution | Pattern |
|---------|---------|--------------|--------------|-------|------------|------------|------------|------------|------------------|------------------|------------|-------------------|---------|
| 1       | USA     | 2            | 6            | P1    | 2639255    | 4593265    | 0.10784314 | 0.89215686 | 284625.54        | 4097912.9        | 0.06945622 | <b>R</b>          | Mixed   |
|         |         |              |              | P2    | 6435200    | 6429546    | 0.34408602 | 0.65591398 | 2214262.4        | 4217229.1        | 0.52505148 | <b>R</b>          |         |
|         |         |              |              | P3    | 6149098    | 4215774    | 0.60927152 | 0.39072848 | 3746470.3        | 1647223          | 2.27441604 | <b>L</b>          |         |
|         |         |              |              | P4    | 1885745    | 1314109    | 0.5        | 0.5        | 942872.5         | 657054.5         | 1.43499892 | <b>L</b>          |         |
|         |         |              |              | P5    | 1891302    | 1321474    | 0.22764228 | 0.77235772 | 430540.29        | 1020650.7        | 0.42182924 | <b>R</b>          |         |
|         |         |              |              | P6    | 5608427    | 6655228    | 0.45901639 | 0.54098361 | 2574359.9        | 3600369.2        | 0.71502664 | <b>R</b>          |         |
| 2       | India   | 2            | 4            | P1    | 1661125    | 4616596    | 0.502732   | 0.497268   | 835100.69        | 2295685.5        | 0.36376965 | <b>R</b>          | Mixed   |
|         |         |              |              | P2    | 1871498    | 2928159    | 0.006623   | 0.993377   | 12394.931        | 2908765.8        | 0.00426123 | <b>R</b>          |         |
|         |         |              |              | P3    | 8052728    | 13645876   | 0.16847826 | 0.83152174 | 1356709.6        | 11346843         | 0.11956715 | <b>R</b>          |         |
|         |         |              |              | P4    | 2110883    | 1055333    | 0.39869281 | 0.60130719 | 841593.88        | 634579.32        | 1.32622329 | <b>L</b>          |         |
| 3       | Brazil  | 1            | 4            | P1    | 3902555    | 1627333    | 0.71495327 | 0.28504673 | 2790144.5        | 463865.95        | 6.0149801  | <b>L</b>          | Mixed   |
|         |         |              |              | P2    | 3669126    | 1346528    | 0.76666667 | 0.23333333 | 2812996.6        | 314189.86        | 8.95317434 | <b>L</b>          |         |
|         |         |              |              | P3    | 4107752    | 1886543    | 0.66304348 | 0.33695652 | 2723618.2        | 635682.96        | 4.28455431 | <b>L</b>          |         |
|         |         |              |              | P4    | 2011587    | 3078744    | 0.24390244 | 0.75609756 | 490630.98        | 2327830.8        | 0.21076745 | <b>R</b>          |         |
| 4       | Russia  | 2            | 4            | P1    | 1499769    | 1521080    | 0.75102041 | 0.24897959 | 1126357.1        | 378717.87        | 2.97413247 | <b>L</b>          | Mixed   |
|         |         |              |              | P2    | 681001     | 942407     | 0.25833333 | 0.74166667 | 175925.26        | 698951.86        | 0.25169867 | <b>R</b>          |         |
|         |         |              |              | P3    | 436082     | 735655     | 0.49593496 | 0.50406504 | 216268.31        | 370817.97        | 0.58321961 | <b>R</b>          |         |
|         |         |              |              | P4    | 2192735    | 1090656    | 0.50204082 | 0.49795918 | 1100842.5        | 543102.17        | 2.0269528  | <b>L</b>          |         |
| 5       | France  | 3            | 4            | P1    | 116583     | 22114      | 0.49180328 | 0.50819672 | 57335.902        | 11238.262        | 5.10184764 | <b>L</b>          | Left    |
|         |         |              |              | P2    | 13269      | 22995      | 0.98360656 | 0.01639344 | 13051.475        | 376.96715        | 34.6223148 | <b>L</b>          |         |
|         |         |              |              | P3    | 2049635    | 400792     | 0.99346405 | 0.00653595 | 2036238.7        | 2619.5565        | 777.321928 | <b>L</b>          |         |
|         |         |              |              | P4    | 3000169    | 508097     | 0.67391304 | 0.32608696 | 2021853          | 165683.8         | 12.2030818 | <b>L</b>          |         |

|    |           |   |   |    |         |         |            |            |           |           |            |   |       |
|----|-----------|---|---|----|---------|---------|------------|------------|-----------|-----------|------------|---|-------|
| 6  | UK        | 2 | 5 | P1 | 218724  | 47254   | 0.5        | 0.5        | 109362    | 23627     | 4.62868752 | L | Mixed |
|    |           |   |   | P2 | 710002  | 618941  | 0.99180328 | 0.00819672 | 704182.31 | 5073.2861 | 138.802012 | L |       |
|    |           |   |   | P3 | 2194451 | 675044  | 0.51098901 | 0.48901099 | 1121340.3 | 330103.93 | 3.39693117 | L |       |
|    |           |   |   | P4 | 1380190 | 937935  | 0.49593496 | 0.50406504 | 684484.47 | 472780.24 | 1.44778569 | L |       |
|    |           |   |   | P5 | 2270510 | 1176255 | 0.23770492 | 0.76229508 | 539711.39 | 896653.4  | 0.60191752 | R |       |
| 7  | Turkey    | 4 | 4 | P1 | 106673  | 110669  | 0.24590164 | 0.75409836 | 26231.066 | 83455.311 | 0.31431272 | R | Mixed |
|    |           |   |   | P2 | 407974  | 1239516 | 0.5754717  | 0.4245283  | 234777.49 | 526209.62 | 0.44616724 | R |       |
|    |           |   |   | P3 | 2119003 | 605061  | 0.5        | 0.5        | 1059501.5 | 302530.5  | 3.50213119 | L |       |
|    |           |   |   | P4 | 301393  | 661256  | 0.33333333 | 0.66666667 | 100464.33 | 440837.33 | 0.22789434 | R |       |
| 8  | Argentina | 2 | 3 | P1 | 1102394 | 458590  | 0.66847826 | 0.33152174 | 736926.42 | 152032.55 | 4.84716201 | L | Left  |
|    |           |   |   | P2 | 301725  | 180126  | 0.52542373 | 0.47457627 | 158533.47 | 85483.525 | 1.85455004 | L |       |
|    |           |   |   | P3 | 1674419 | 1403836 | 0.5        | 0.5        | 837209.5  | 701918    | 1.19274545 | L |       |
| 9  | Colombia  | 2 | 4 | P1 | 266125  | 534171  | 0.5        | 0.5        | 133062.5  | 267085.5  | 0.49820189 | R | Mixed |
|    |           |   |   | P2 | 1265205 | 311493  | 0.84615385 | 0.15384615 | 1070558.1 | 47921.999 | 22.3395958 | L |       |
|    |           |   |   | P3 | 453347  | 1381258 | 0.67032967 | 0.32967033 | 303891.94 | 455359.78 | 0.66736668 | R |       |
|    |           |   |   | P4 | 544338  | 123766  | 0.74796748 | 0.25203252 | 407147.12 | 31193.057 | 13.0524919 | L |       |
| 10 | Spain     | 2 | 4 | P1 | 1552264 | 280078  | 0.88727273 | 0.11272727 | 1377281.5 | 31572.428 | 43.6229201 | L | Mixed |
|    |           |   |   | P2 | 814854  | 1065841 | 0.16574586 | 0.83425414 | 135058.68 | 889182.27 | 0.15189088 | R |       |
|    |           |   |   | P3 | 638084  | 408021  | 0.5        | 0.5        | 319042    | 204010.5  | 1.56385088 | L |       |
|    |           |   |   | P4 | 130570  | 1150131 | 0.00813008 | 0.99186992 | 1061.5447 | 1140780.3 | 0.00093054 | R |       |
| 11 | Italy     | 2 | 3 | P1 | 573638  | 2245835 | 0.89869281 | 0.10130719 | 515524.35 | 227519.23 | 2.26584952 | L | Left  |
|    |           |   |   | P2 | 659634  | 675010  | 0.8        | 0.2        | 527707.2  | 135002    | 3.90888431 | L |       |
|    |           |   |   | P3 | 90119   | 189963  | 0.79738562 | 0.20261438 | 71859.595 | 38489.235 | 1.867005   | L |       |
| 12 | Iran      | 2 | 3 | P1 | 1180537 | 192857  | 0.5        | 0.5        | 590268.5  | 96428.5   | 6.1213075  | L | Mixed |
|    |           |   |   | P2 | 1081078 | 705480  | 0.59333333 | 0.40666667 | 641439.61 | 286895.2  | 2.23579765 | R |       |
|    |           |   |   | P3 | 666451  | 1121055 | 0.5        | 0.5        | 333225.5  | 560527.5  | 0.59448555 | R |       |
| 13 | Germany   | 2 | 2 | P1 | 1688712 | 689775  | 0.82335329 | 0.17664671 | 1390406.6 | 121846.48 | 11.4111342 | L | Left  |
|    |           |   |   | P2 | 955070  | 560316  | 0.64893617 | 0.35106383 | 619779.47 | 196706.68 | 3.15077996 | L |       |

|    |              |   |   |    |         |         |            |            |           |           |            |          |       |
|----|--------------|---|---|----|---------|---------|------------|------------|-----------|-----------|------------|----------|-------|
| 14 | Indonesia    | 2 | 4 | P1 | 230623  | 123080  | 0.74796748 | 0.25203252 | 172498.5  | 31020.163 | 5.56085107 | <b>L</b> | Mixed |
|    |              |   |   | P2 | 128795  | 204315  | 0.49180328 | 0.50819672 | 63341.803 | 103832.21 | 0.61004    | <b>R</b> |       |
|    |              |   |   | P3 | 335116  | 590054  | 0.20529801 | 0.79470199 | 68798.649 | 468917.09 | 0.14671815 | <b>R</b> |       |
|    |              |   |   | P4 | 2421433 | 172550  | 0.42990654 | 0.57009346 | 1040989.9 | 98369.626 | 10.5824321 | <b>L</b> |       |
| 15 | Poland       | 3 | 2 | P1 | 271217  | 1150654 | 0.25203252 | 0.74796748 | 68355.504 | 860651.77 | 0.07942295 | <b>R</b> | Mixed |
|    |              |   |   | P2 | 1278757 | 90797   | 0.41981132 | 0.58018868 | 536836.67 | 52679.392 | 10.1906391 | <b>L</b> |       |
| 16 | Mexico       | 2 | 3 | P1 | 580336  | 143656  | 0.80392157 | 0.19607843 | 466544.63 | 28167.843 | 16.5630229 | <b>L</b> | Mixed |
|    |              |   |   | P2 | 1121044 | 549482  | 0.4379562  | 0.5620438  | 490968.18 | 308832.95 | 1.58975322 | <b>L</b> |       |
|    |              |   |   | P3 | 938668  | 603962  | 0.37908497 | 0.62091503 | 355834.93 | 375009.08 | 0.94887015 | <b>R</b> |       |
| 17 | South Africa | 4 | 3 | P1 | 594358  | 98411   | 0.60130719 | 0.39869281 | 357391.74 | 39235.758 | 9.10882715 | <b>L</b> | Left  |
|    |              |   |   | P2 | 728309  | 127449  | 0.50828729 | 0.49171271 | 370190.21 | 62668.293 | 5.90713723 | <b>L</b> |       |
|    |              |   |   | P3 | 866244  | 330205  | 0.74796748 | 0.25203252 | 647922.34 | 83222.398 | 7.78543222 | <b>L</b> |       |
| 18 | Ukraine      | 3 | 2 | P1 | 1041743 | 174549  | 0.85581395 | 0.14418605 | 891538.19 | 25167.531 | 35.4241422 | <b>L</b> | Left  |
|    |              |   |   | P2 | 862524  | 209339  | 0.41981132 | 0.58018868 | 362097.34 | 121456.12 | 2.98130177 | <b>L</b> |       |
|    |              |   |   | P3 | 1273213 | 227330  | 0.74590164 | 0.25409836 | 949691.66 | 57764.18  | 16.4408403 | <b>L</b> |       |
| 19 | Peru         | 2 | 2 | P1 | 610190  | 315364  | 0.57476636 | 0.42523364 | 350716.69 | 134103.38 | 2.615271   | <b>L</b> | Mixed |
|    |              |   |   | P2 | 586277  | 600784  | 0.44160584 | 0.55839416 | 258903.35 | 335474.28 | 0.7717532  | <b>R</b> |       |
| 20 | Netherlands  | 2 | 7 | P1 | 26845   | 10971   | 0.19607843 | 0.80392157 | 5263.7255 | 8819.8235 | 0.59680621 | <b>R</b> | Mixed |
|    |              |   |   | P2 | 307157  | 174290  | 0.19607843 | 0.80392157 | 60226.862 | 140115.49 | 0.42983729 | <b>R</b> |       |
|    |              |   |   | P3 | 276452  | 295182  | 0.19607843 | 0.80392157 | 54206.274 | 237303.18 | 0.22842625 | <b>R</b> |       |
|    |              |   |   | P4 | 189242  | 230167  | 0.19607843 | 0.80392157 | 37106.274 | 185036.22 | 0.2005352  | <b>R</b> |       |
|    |              |   |   | P5 | 153771  | 36003   | 0.25203252 | 0.74796748 | 38755.293 | 26929.073 | 1.43916177 | <b>L</b> |       |
|    |              |   |   | P6 | 35744   | 180663  | 0.5        | 0.5        | 17872     | 90331.5   | 0.19784903 | <b>R</b> |       |
|    |              |   |   | P7 | 779483  | 458444  | 0.74590164 | 0.25409836 | 581417.65 | 116489.87 | 4.99114346 | <b>L</b> |       |
| 21 | Czechia      | 2 | 2 | P1 | 264339  | 649672  | 0.20529801 | 0.79470199 | 54268.271 | 516295.63 | 0.10511085 | <b>R</b> | Right |
|    |              |   |   | P2 | 296852  | 655285  | 0.25203252 | 0.74796748 | 74816.358 | 490131.87 | 0.15264536 | <b>R</b> |       |
| 22 | Iraq         | 2 | 5 | P1 | 185825  | 128047  | 0.67391304 | 0.32608696 | 125229.89 | 41754.457 | 2.99919816 | <b>L</b> | Mixed |
|    |              |   |   | P2 | 189568  | 67087   | 0.25619835 | 0.74380165 | 48567.009 | 49899.421 | 0.97329804 | <b>R</b> |       |

|    |             |   |   |    |         |        |            |            |           |           |            |          |       |
|----|-------------|---|---|----|---------|--------|------------|------------|-----------|-----------|------------|----------|-------|
|    |             |   |   | P3 | 75853   | 155435 | 0.50847458 | 0.49152542 | 38569.322 | 76400.254 | 0.50483238 | <b>R</b> |       |
|    |             |   |   | P4 | 214275  | 136153 | 0.01086957 | 0.98913043 | 2329.0761 | 134673.08 | 0.0172943  | <b>R</b> |       |
|    |             |   |   | P5 | 686798  | 204986 | 0.20915033 | 0.79084967 | 143644.03 | 162113.11 | 0.88607285 | <b>R</b> |       |
| 23 | Chile       | 3 | 6 | P1 | 105848  | 288176 | 0.25203252 | 0.74796748 | 26677.138 | 215546.28 | 0.12376525 | <b>R</b> | Mixed |
|    |             |   |   | P2 | 51265   | 88752  | 0.32967033 | 0.67032967 | 16900.549 | 59493.099 | 0.2840758  | <b>R</b> |       |
|    |             |   |   | P3 | 175366  | 97516  | 0.68888889 | 0.31111111 | 120807.69 | 30338.311 | 3.98201762 | <b>L</b> |       |
|    |             |   |   | P4 | 170913  | 202707 | 0.50819672 | 0.49180328 | 86857.426 | 99691.967 | 0.87125802 | <b>R</b> |       |
|    |             |   |   | P5 | 357657  | 59869  | 0.39869281 | 0.60130719 | 142595.27 | 35999.66  | 3.96101724 | <b>L</b> |       |
|    |             |   |   | P6 | 40784   | 107843 | 0.32608696 | 0.67391304 | 13299.13  | 72676.804 | 0.18299003 | <b>R</b> |       |
| 24 | Philippines | 3 | 3 | P1 | 202733  | 253245 | 0.42990654 | 0.57009346 | 87156.243 | 144373.32 | 0.60368663 | <b>R</b> | Mixed |
|    |             |   |   | P2 | 273224  | 841677 | 0.37037037 | 0.62962963 | 101194.07 | 529944.78 | 0.19095211 | <b>R</b> |       |
|    |             |   |   | P3 | 1198311 | 52514  | 0.39869281 | 0.60130719 | 477757.98 | 31577.046 | 15.1299138 | <b>L</b> |       |
| 25 | Canada      | 3 | 5 | P1 | 47470   | 49313  | 0.32967033 | 0.67032967 | 15649.451 | 33055.967 | 0.47342286 | <b>R</b> | Mixed |
|    |             |   |   | P2 | 276679  | 204721 | 0.83152174 | 0.16847826 | 230064.6  | 34491.038 | 6.67027198 | <b>L</b> |       |
|    |             |   |   | P3 | 196306  | 87508  | 0.49152542 | 0.50847458 | 96489.389 | 44495.594 | 2.16851561 | <b>L</b> |       |
|    |             |   |   | P4 | 518571  | 48643  | 0.49456522 | 0.50543478 | 256467.18 | 24585.864 | 10.4314893 | <b>L</b> |       |
|    |             |   |   | P5 | 193190  | 169220 | 0.30208333 | 0.69791667 | 58359.479 | 118101.46 | 0.49414698 | <b>R</b> |       |
| 26 | Bangladesh  | 3 | 5 | P1 | 98330   | 92178  | 0.49180328 | 0.50819672 | 48359.017 | 46844.557 | 1.03232946 | <b>L</b> | Mixed |
|    |             |   |   | P2 | 75335   | 94688  | 0.32608696 | 0.67391304 | 24565.761 | 63811.478 | 0.38497402 | <b>R</b> |       |
|    |             |   |   | P3 | 105826  | 32706  | 0.50420168 | 0.49579832 | 53357.647 | 16215.58  | 3.29051736 | <b>L</b> |       |
|    |             |   |   | P4 | 212916  | 41408  | 0.49593496 | 0.50406504 | 105592.49 | 20872.325 | 5.058971   | <b>L</b> |       |
|    |             |   |   | P5 | 700078  | 83900  | 0.28504673 | 0.71495327 | 199554.94 | 59984.579 | 3.32677074 | <b>L</b> |       |
| 27 | Malaysia    | 1 | 3 | P1 | 183411  | 130541 | 0.60927152 | 0.39072848 | 111747.1  | 51006.087 | 2.19085812 | <b>L</b> | Mixed |
|    |             |   |   | P2 | 226857  | 179622 | 0.67032967 | 0.32967033 | 152068.98 | 59216.044 | 2.56803676 | <b>L</b> |       |
|    |             |   |   | P3 | 361293  | 632982 | 0.5        | 0.5        | 180646.5  | 316491    | 0.57077926 | <b>R</b> |       |
| 28 | Belgium     | 2 | 3 | P1 | 105826  | 32706  | 0.64071856 | 0.35928144 | 67804.682 | 11750.659 | 5.77028774 | <b>L</b> | Mixed |
|    |             |   |   | P2 | 416454  | 342282 | 0.20261438 | 0.79738562 | 84379.569 | 272930.75 | 0.3091611  | <b>R</b> |       |
|    |             |   |   | P3 | 680904  | 309746 | 0.32608696 | 0.67391304 | 222033.91 | 208741.87 | 1.06367694 | <b>L</b> |       |

|    |             |   |   |    |        |        |            |            |           |           |            |          |       |
|----|-------------|---|---|----|--------|--------|------------|------------|-----------|-----------|------------|----------|-------|
| 29 | Sweden      | 1 | 3 | P1 | 369455 | 219930 | 0.75720165 | 0.24279835 | 279751.94 | 53398.641 | 5.23893361 | <b>L</b> | Mixed |
|    |             |   |   | P2 | 316295 | 126436 | 0.28773585 | 0.71226415 | 91009.41  | 90055.83  | 1.01058877 | <b>L</b> |       |
|    |             |   |   | P3 | 26773  | 44699  | 0.19736842 | 0.80263158 | 5284.1447 | 35876.829 | 0.14728572 | <b>R</b> |       |
| 30 | Romania     | 2 | 3 | P1 | 424476 | 326632 | 0.575472   | 0.424528   | 244274.05 | 138664.43 | 1.76162014 | <b>L</b> | Left  |
|    |             |   |   | P2 | 253271 | 22472  | 0.49593496 | 0.50406504 | 125605.94 | 11327.35  | 11.0887319 | <b>L</b> |       |
|    |             |   |   | P3 | 564842 | 157695 | 0.79738562 | 0.20261438 | 450396.89 | 31951.275 | 14.0963669 | <b>L</b> |       |
| 31 | Pakistan    | 3 | 6 | P1 | 195356 | 99336  | 0.39869281 | 0.60130719 | 77887.033 | 59731.451 | 1.30395347 | <b>L</b> | Mixed |
|    |             |   |   | P2 | 87676  | 180883 | 0.40397351 | 0.59602649 | 35418.781 | 107811.06 | 0.32852642 | <b>R</b> |       |
|    |             |   |   | P3 | 91566  | 152588 | 0.50819672 | 0.49180328 | 46533.541 | 75043.279 | 0.62008939 | <b>R</b> |       |
|    |             |   |   | P4 | 97305  | 35584  | 0.50819672 | 0.49180328 | 49450.082 | 17500.328 | 2.82566601 | <b>L</b> |       |
|    |             |   |   | P5 | 76429  | 128851 | 0.33695652 | 0.66304348 | 25753.25  | 85433.815 | 0.30144095 | <b>R</b> |       |
|    |             |   |   | P6 | 82850  | 48323  | 0.24590164 | 0.75409836 | 20372.951 | 36440.295 | 0.55907755 | <b>R</b> |       |
| 32 | Japan       | 4 | 3 | P1 | 353932 | 84475  | 0.75720165 | 0.24279835 | 267997.89 | 20510.391 | 13.0664452 | <b>L</b> | Left  |
|    |             |   |   | P2 | 272547 | 53117  | 0.5        | 0.5        | 136273.5  | 26558.5   | 5.13106915 | <b>L</b> |       |
|    |             |   |   | P3 | 905489 | 26374  | 0.39869281 | 0.60130719 | 361011.95 | 15858.876 | 22.7640319 | <b>L</b> |       |
| 33 | Portugal    | 2 | 4 | P1 | 17602  | 17096  | 0.34065934 | 0.65934066 | 5996.2857 | 11272.088 | 0.53195874 | <b>R</b> | Mixed |
|    |             |   |   | P2 | 255920 | 115617 | 0.83695652 | 0.16304348 | 214193.91 | 18850.598 | 11.3627118 | <b>L</b> |       |
|    |             |   |   | P3 | 306838 | 128577 | 0.20529801 | 0.79470199 | 62993.231 | 102180.4  | 0.61649037 | <b>R</b> |       |
|    |             |   |   | P4 | 119538 | 69296  | 0.66304348 | 0.33695652 | 79258.891 | 23349.739 | 3.39442299 | <b>L</b> |       |
| 34 | Israel      | 3 | 3 | P1 | 241694 | 89780  | 0.66545455 | 0.33454545 | 160836.37 | 30035.491 | 5.35487749 | <b>L</b> | Mixed |
|    |             |   |   | P2 | 306244 | 196040 | 0.14553991 | 0.85446009 | 44570.723 | 167508.36 | 0.26608059 | <b>R</b> |       |
|    |             |   |   | P3 | 442743 | 61442  | 0.32786885 | 0.67213115 | 145161.64 | 41297.082 | 3.51505802 | <b>L</b> |       |
| 35 | Hungary     | 3 | 3 | P1 | 241694 | 89780  | 0.66545455 | 0.33454545 | 160836.37 | 30035.491 | 5.35487749 | <b>L</b> | Mixed |
|    |             |   |   | P2 | 306244 | 198886 | 0.38410596 | 0.61589404 | 117630.15 | 122492.7  | 0.9603033  | <b>R</b> |       |
|    |             |   |   | P3 | 293617 | 146586 | 0.9869281  | 0.0130719  | 289778.87 | 1916.1569 | 151.2292   | <b>L</b> |       |
| 36 | Switzerland | 2 | 4 | P1 | 12981  | 1276   | 0.34065934 | 0.65934066 | 4422.0989 | 841.31868 | 5.25615202 | <b>L</b> | Left  |
|    |             |   |   | P2 | 296210 | 227860 | 0.63374486 | 0.36625514 | 187721.56 | 83454.896 | 2.24937749 | <b>L</b> |       |
|    |             |   |   | P3 | 105042 | 43030  | 0.40522876 | 0.59477124 | 42566.039 | 25593.007 | 1.66319026 | <b>L</b> |       |



|    |              |   |   |    |        |        |            |            |           |           |            |          |       |
|----|--------------|---|---|----|--------|--------|------------|------------|-----------|-----------|------------|----------|-------|
|    |              |   |   | P4 | 137359 | 32195  | 0.68131868 | 0.31868132 | 93585.253 | 10259.945 | 9.12141851 | <b>L</b> |       |
| 37 | Nepal        | 2 | 3 | P1 | 131283 | 103400 | 0.337017   | 0.662983   | 44244.603 | 68552.442 | 0.6454125  | <b>R</b> | Right |
|    |              |   |   | P2 | 45878  | 332536 | 0.33152174 | 0.66847826 | 15209.554 | 222293.09 | 0.06842118 | <b>R</b> |       |
|    |              |   |   | P3 | 67258  | 65325  | 0.20261438 | 0.79738562 | 13627.438 | 52089.216 | 0.26161726 | <b>R</b> |       |
| 38 | Austria      | 2 | 3 | P1 | 272276 | 176984 | 0.668493   | 0.331507   | 182014.6  | 58671.435 | 3.10226945 | <b>L</b> | Mixed |
|    |              |   |   | P2 | 86789  | 104183 | 0.362983   | 0.637017   | 31502.932 | 66366.342 | 0.47468236 | <b>R</b> |       |
|    |              |   |   | P3 | 509583 | 111775 | 0.79084967 | 0.20915033 | 403003.55 | 23377.778 | 17.238745  | <b>L</b> |       |
| 39 | Kazakhstan   | 2 | 3 | P1 | 68059  | 110829 | 0.163043   | 0.836957   | 11096.544 | 92759.107 | 0.11962754 | <b>R</b> | Mixed |
|    |              |   |   | P2 | 241739 | 39751  | 0.828729   | 0.171271   | 200336.12 | 6808.1935 | 29.4257381 | <b>L</b> |       |
|    |              |   |   | P3 | 150783 | 230112 | 0.51612903 | 0.48387097 | 77823.484 | 111344.52 | 0.69894312 | <b>R</b> |       |
| 40 | Tunisia      | 1 | 4 | P1 | 41400  | 79327  | 0.33695652 | 0.66304348 | 13950     | 52597.25  | 0.26522299 | <b>R</b> | Mixed |
|    |              |   |   | P2 | 69745  | 24392  | 0.52542373 | 0.47457627 | 36645.678 | 11575.864 | 3.16569691 | <b>L</b> |       |
|    |              |   |   | P3 | 20741  | 91456  | 0.336957   | 0.663043   | 6988.8251 | 60639.261 | 0.11525248 | <b>R</b> |       |
|    |              |   |   | P4 | 244091 | 74469  | 0.66304348 | 0.33695652 | 161842.95 | 25092.815 | 6.44977235 | <b>L</b> |       |
| 41 | Jordan       | 3 | 2 | P1 | 207605 | 107425 | 0.49593496 | 0.50406504 | 102958.58 | 54149.187 | 1.90138731 | <b>L</b> | Left  |
|    |              |   |   | P2 | 284722 | 139827 | 0.32596685 | 0.67403315 | 92809.934 | 94248.033 | 0.98474133 | <b>L</b> |       |
| 42 | Serbia       | 3 | 4 | P1 | 128484 | 219825 | 0.32608696 | 0.67391304 | 41896.957 | 148142.93 | 0.28281441 | <b>R</b> | Mixed |
|    |              |   |   | P2 | 205333 | 115966 | 0.39333333 | 0.60666667 | 80764.313 | 70352.707 | 1.14799156 | <b>R</b> |       |
|    |              |   |   | P3 | 225427 | 200760 | 0.74796748 | 0.25203252 | 168612.07 | 50598.049 | 3.33238275 | <b>L</b> |       |
|    |              |   |   | P4 | 112096 | 40353  | 0.49180328 | 0.50819672 | 55129.18  | 20507.262 | 2.68827596 | <b>L</b> |       |
| 43 | UAE          | 1 | 4 | P1 | 38439  | 36231  | 0.50819672 | 0.49180328 | 19534.574 | 17818.525 | 1.09630703 | <b>L</b> | Mixed |
|    |              |   |   | P2 | 134749 | 216627 | 0.41059603 | 0.58940397 | 55327.404 | 127680.81 | 0.4333259  | <b>R</b> |       |
|    |              |   |   | P3 | 112671 | 47951  | 0.49593496 | 0.50406504 | 55877.488 | 24170.423 | 2.3118126  | <b>L</b> |       |
|    |              |   |   | P4 | 55134  | 6049   | 0.24390244 | 0.75609756 | 13447.317 | 4573.6341 | 2.94018206 | <b>L</b> |       |
| 44 | Morocco      | 2 | 3 | P1 | 332014 | 127318 | 0.50205761 | 0.49794239 | 166690.16 | 63397.029 | 2.6293055  | <b>L</b> | Mixed |
|    |              |   |   | P2 | 15152  | 20112  | 0.32608696 | 0.67391304 | 4940.8696 | 13553.739 | 0.36453923 | <b>R</b> |       |
|    |              |   |   | P3 | 329587 | 88969  | 0.39869281 | 0.60130719 | 131403.97 | 53497.699 | 2.45625455 | <b>L</b> |       |
| 45 | Saudi Arabia | 2 | 4 | P1 | 168070 | 156459 | 0.33152174 | 0.66847826 | 55718.859 | 104589.44 | 0.53273886 | <b>R</b> | Mixed |

|    |          |   |   |    |        |        |            |            |           |           |            |          |       |
|----|----------|---|---|----|--------|--------|------------|------------|-----------|-----------|------------|----------|-------|
|    |          |   |   | P2 | 10078  | 5381   | 0.49180328 | 0.50819672 | 4956.3934 | 2734.6066 | 1.8124704  | <b>L</b> |       |
|    |          |   |   | P3 | 5333   | 9309   | 0.65555556 | 0.34444444 | 3496.0778 | 3206.4333 | 1.09033228 | <b>L</b> |       |
|    |          |   |   | P4 | 165935 | 6434   | 0.66393443 | 0.33606557 | 110169.96 | 2162.2459 | 50.9516327 | <b>L</b> |       |
| 46 | Lebanon  | 1 | 3 | P1 | 261418 | 73998  | 0.81456954 | 0.18543046 | 212943.14 | 13721.483 | 15.518959  | <b>L</b> | Mixed |
|    |          |   |   | P2 | 151528 | 18288  | 0.39869281 | 0.60130719 | 60413.124 | 10996.706 | 5.49374738 | <b>L</b> |       |
|    |          |   |   | P3 | 57400  | 39758  | 0.25409836 | 0.74590164 | 14585.246 | 29655.557 | 0.49182167 | <b>R</b> |       |
| 47 | Ecuador  | 2 | 5 | P1 | 19969  | 60421  | 0.18584071 | 0.81415929 | 3711.0531 | 49192.319 | 0.07543969 | <b>R</b> | Mixed |
|    |          |   |   | P2 | 51692  | 75465  | 0.5        | 0.5        | 25846     | 37732.5   | 0.68497979 | <b>R</b> |       |
|    |          |   |   | P3 | 38316  | 35327  | 0.68888889 | 0.31111111 | 26395.467 | 10990.622 | 2.40163533 | <b>L</b> |       |
|    |          |   |   | P4 | 95707  | 76642  | 0.33152174 | 0.66847826 | 31728.951 | 51233.511 | 0.61930074 | <b>L</b> |       |
|    |          |   |   | P5 | 28868  | 13829  | 0.53787879 | 0.46212121 | 15527.485 | 6390.6742 | 2.42970996 | <b>L</b> |       |
| 48 | Bolivia  | 2 | 3 | P1 | 83379  | 28110  | 0.40522876 | 0.59477124 | 33787.569 | 16719.02  | 2.02090609 | <b>L</b> | Mixed |
|    |          |   |   | P2 | 72127  | 55576  | 0.51239669 | 0.48760331 | 36957.636 | 27099.041 | 1.36379866 | <b>L</b> |       |
|    |          |   |   | P3 | 167213 | 33882  | 0.59477124 | 0.40522876 | 99453.484 | 13729.961 | 7.24353734 | <b>L</b> |       |
| 49 | Greece   | 3 | 3 | P1 | 66020  | 51686  | 0.32608696 | 0.67391304 | 21528.261 | 34831.87  | 0.61806217 | <b>R</b> | Right |
|    |          |   |   | P2 | 106732 | 158767 | 0.39333333 | 0.60666667 | 41981.253 | 96318.647 | 0.43585801 | <b>R</b> |       |
|    |          |   |   | P3 | 70848  | 94660  | 0.5        | 0.5        | 35424     | 47330     | 0.74844707 | <b>R</b> |       |
| 50 | Paraguay | 1 | 3 | P1 | 92469  | 26247  | 0.81456954 | 0.18543046 | 75322.43  | 4866.9934 | 15.4761728 | <b>L</b> | Mixed |
|    |          |   |   | P2 | 119603 | 76307  | 0.66304348 | 0.33695652 | 79301.989 | 25712.141 | 3.08422345 | <b>L</b> |       |
|    |          |   |   | P3 | 67898  | 35246  | 0.32608696 | 0.67391304 | 22140.652 | 23752.739 | 0.93213048 | <b>R</b> |       |
| 51 | Belarus  | 2 | 4 | P1 | 38165  | 57637  | 0.49180328 | 0.50819672 | 18769.672 | 29290.934 | 0.64080141 | <b>R</b> | Mixed |
|    |          |   |   | P2 | 93022  | 34501  | 0.65555556 | 0.34444444 | 60981.089 | 11883.678 | 5.13149969 | <b>L</b> |       |
|    |          |   |   | P3 | 72632  | 22750  | 0.5        | 0.5        | 36316     | 11375     | 3.19261538 | <b>L</b> |       |
|    |          |   |   | P4 | 51601  | 92046  | 0.25409836 | 0.74590164 | 13111.73  | 68657.262 | 0.19097367 | <b>R</b> |       |
| 52 | Bulgaria | 3 | 3 | P1 | 92456  | 73448  | 0.32608696 | 0.67391304 | 30148.696 | 49497.565 | 0.60909452 | <b>R</b> | Mixed |
|    |          |   |   | P2 | 185632 | 17449  | 0.39333333 | 0.60666667 | 73015.253 | 10585.727 | 6.89751924 | <b>L</b> |       |
|    |          |   |   | P3 | 180663 | 138190 | 0.60927152 | 0.39072848 | 110072.82 | 53994.768 | 2.03858309 | <b>L</b> |       |
| 53 | Panama   | 2 | 3 | P1 | 47339  | 19613  | 0.67391304 | 0.32608696 | 31902.37  | 6395.5435 | 4.9882187  | <b>L</b> | Left  |

|    |            |   |   |    |        |        |            |            |           |           |            |          |       |
|----|------------|---|---|----|--------|--------|------------|------------|-----------|-----------|------------|----------|-------|
|    |            |   |   | P2 | 207784 | 44197  | 0.60666667 | 0.39333333 | 126055.63 | 17384.153 | 7.2511801  | <b>L</b> |       |
|    |            |   |   | P3 | 39202  | 31877  | 0.70754717 | 0.29245283 | 27737.264 | 9322.5189 | 2.97529719 | <b>L</b> |       |
| 54 | Slovakia   | 2 | 2 | P1 | 121879 | 128540 | 0.40397351 | 0.59602649 | 49235.887 | 76613.245 | 0.64265503 | <b>R</b> | Right |
|    |            |   |   | P2 | 53102  | 33738  | 0.20261438 | 0.79738562 | 10759.229 | 26902.196 | 0.39993868 | <b>R</b> |       |
| 55 | Costa Rica | 2 | 4 | P1 | 34473  | 34211  | 0.49180328 | 0.50819672 | 16953.934 | 17385.918 | 0.97515325 | <b>R</b> | Mixed |
|    |            |   |   | P2 | 59350  | 35020  | 0.50833333 | 0.49166667 | 30169.583 | 17218.167 | 1.75219487 | <b>L</b> |       |
|    |            |   |   | P3 | 114645 | 48952  | 0.60130719 | 0.39869281 | 68936.863 | 19516.81  | 3.53217873 | <b>L</b> |       |
|    |            |   |   | P4 | 164247 | 38371  | 0.39869281 | 0.60130719 | 65484.098 | 23072.758 | 2.83815648 | <b>L</b> |       |
| 56 | Georgia    | 2 | 4 | P1 | 188484 | 54341  | 0.40397351 | 0.59602649 | 76142.543 | 32388.675 | 2.35090018 | <b>L</b> | Mixed |
|    |            |   |   | P2 | 28549  | 55768  | 0.24590164 | 0.75409836 | 7020.2459 | 42054.557 | 0.16693187 | <b>R</b> |       |
|    |            |   |   | P3 | 183733 | 63201  | 0.68478261 | 0.31521739 | 125817.16 | 19922.054 | 6.31547133 | <b>L</b> |       |
|    |            |   |   | P4 | 106235 | 211297 | 0.31372549 | 0.68627451 | 33328.627 | 145007.75 | 0.22984033 | <b>R</b> |       |
| 57 | Kuwait     | 2 | 4 | P1 | 20073  | 20744  | 0.79738562 | 0.20261438 | 16005.922 | 4203.0327 | 3.80818394 | <b>L</b> | Left  |
|    |            |   |   | P2 | 16709  | 7949   | 0.49180328 | 0.50819672 | 8217.541  | 4039.6557 | 2.03421814 | <b>L</b> |       |
|    |            |   |   | P3 | 81519  | 41888  | 0.75       | 0.25       | 61139.25  | 10472     | 5.83835466 | <b>L</b> |       |
|    |            |   |   | P4 | 123840 | 12029  | 0.74796748 | 0.25203252 | 92628.293 | 3031.6992 | 30.5532597 | <b>L</b> |       |
| 58 | Thailand   | 1 | 4 | P1 | 130929 | 99509  | 0.8        | 0.2        | 104743.2  | 19901.8   | 5.26300134 | <b>L</b> | Mixed |
|    |            |   |   | P2 | 337986 | 607442 | 0.50819672 | 0.49180328 | 171763.38 | 298741.97 | 0.57495563 | <b>R</b> |       |
|    |            |   |   | P3 | 398746 | 308549 | 0.48387097 | 0.51612903 | 192941.61 | 159251.1  | 1.21155594 | <b>L</b> |       |
|    |            |   |   | P4 | 203848 | 101415 | 0.47540984 | 0.52459016 | 96911.344 | 53201.311 | 1.8215969  | <b>L</b> |       |
| 59 | Uruguay    | 1 | 2 | P1 | 311356 | 15584  | 0.82872928 | 0.17127072 | 258029.83 | 2669.0829 | 96.6735941 | <b>R</b> | Mixed |
|    |            |   |   | P2 | 8965   | 5796   | 0.98901099 | 0.01098901 | 8866.4835 | 63.692308 | 139.208075 | <b>L</b> |       |
| 60 | Croatia    | 3 | 3 | P1 | 161521 | 32136  | 0.50833333 | 0.49166667 | 82106.508 | 15800.2   | 5.19654867 | <b>L</b> | Left  |
|    |            |   |   | P2 | 89210  | 27689  | 0.33152174 | 0.66847826 | 29575.054 | 18509.495 | 1.59783155 | <b>L</b> |       |
|    |            |   |   | P3 | 244590 | 95515  | 0.59477124 | 0.40522876 | 145475.1  | 38705.425 | 3.7585196  | <b>L</b> |       |
| 61 | Azerbaijan | 3 | 3 | P1 | 163431 | 15837  | 0.50833333 | 0.49166667 | 83077.425 | 7786.525  | 10.669384  | <b>L</b> | Mixed |
|    |            |   |   | P2 | 27176  | 74334  | 0.20261438 | 0.79738562 | 5506.2484 | 59272.863 | 0.09289662 | <b>R</b> |       |
|    |            |   |   | P3 | 147855 | 131940 | 0.33152174 | 0.66847826 | 49017.147 | 88199.022 | 0.55575613 | <b>R</b> |       |

|    |                    |   |   |    |        |        |            |            |           |           |            |          |       |
|----|--------------------|---|---|----|--------|--------|------------|------------|-----------|-----------|------------|----------|-------|
| 62 | Dominican Republic | 4 | 3 | P1 | 87042  | 38667  | 0.75720165 | 0.24279835 | 65908.346 | 9388.284  | 7.02027613 | <b>L</b> | Mixed |
|    |                    |   |   | P2 | 40059  | 57387  | 0.39869281 | 0.60130719 | 15971.235 | 34507.216 | 0.46283755 | <b>R</b> |       |
|    |                    |   |   | P3 | 57078  | 9019   | 0.63114754 | 0.36885246 | 36024.639 | 3326.6803 | 10.8290054 | <b>L</b> |       |
| 63 | Guatemala          | 2 | 3 | P1 | 51565  | 15038  | 0.86792453 | 0.13207547 | 44754.528 | 1986.1509 | 22.5332966 | <b>L</b> | Mixed |
|    |                    |   |   | P2 | 53129  | 26746  | 0.49593496 | 0.50406504 | 26348.528 | 13481.724 | 1.95438872 | <b>L</b> |       |
|    |                    |   |   | P3 | 215860 | 156398 | 0.28504673 | 0.71495327 | 61530.187 | 111817.26 | 0.55027449 | <b>R</b> |       |
| 64 | Palestine          | 3 | 5 | P1 | 52357  | 20958  | 0.48387097 | 0.51612903 | 25334.032 | 10817.032 | 2.34205017 | <b>L</b> | Mixed |
|    |                    |   |   | P2 | 24650  | 58741  | 0.47457627 | 0.52542373 | 11698.305 | 30863.915 | 0.37902855 | <b>R</b> |       |
|    |                    |   |   | P3 | 54109  | 20276  | 0.24590164 | 0.75409836 | 13305.492 | 15290.098 | 0.87020315 | <b>R</b> |       |
|    |                    |   |   | P4 | 25544  | 61434  | 0.01639344 | 0.98360656 | 418.7541  | 60426.885 | 0.00692993 | <b>R</b> |       |
|    |                    |   |   | P5 | 49281  | 7056   | 0.01408451 | 0.98591549 | 694.09859 | 6956.6197 | 0.09977527 | <b>R</b> |       |
| 65 | Denmark            | 1 | 3 | P1 | 117253 | 47767  | 0.19607843 | 0.80392157 | 22990.784 | 38400.922 | 0.59870397 | <b>L</b> | Left  |
|    |                    |   |   | P2 | 19412  | 19954  | 0.50819672 | 0.49180328 | 9865.1148 | 9813.4426 | 1.00526544 | <b>L</b> |       |
|    |                    |   |   | P3 | 43254  | 23406  | 0.49593496 | 0.50406504 | 21451.171 | 11798.146 | 1.81818144 | <b>L</b> |       |
| 66 | Venezuela          | 2 | 4 | P1 | 45285  | 10381  | 0.67032967 | 0.32967033 | 30355.879 | 3422.3077 | 8.87000289 | <b>L</b> | Mixed |
|    |                    |   |   | P2 | 24533  | 12189  | 0.68888889 | 0.31111111 | 16900.511 | 3792.1333 | 4.45672914 | <b>L</b> |       |
|    |                    |   |   | P3 | 21381  | 37186  | 0.33695652 | 0.66304348 | 7204.4674 | 24655.935 | 0.29220013 | <b>R</b> |       |
|    |                    |   |   | P4 | 171285 | 75015  | 0.62704918 | 0.37295082 | 107404.12 | 27976.906 | 3.8390278  | <b>L</b> |       |
| 67 | Oman               | 2 | 4 | P1 | 67722  | 6563   | 0.66304348 | 0.33695652 | 44902.63  | 2211.4457 | 20.3046502 | <b>L</b> | Mixed |
|    |                    |   |   | P2 | 28712  | 14433  | 0.5        | 0.5        | 14356     | 7216.5    | 1.98933001 | <b>L</b> |       |
|    |                    |   |   | P3 | 64386  | 23971  | 0.79470199 | 0.20529801 | 51167.682 | 4921.1987 | 10.3974022 | <b>L</b> |       |
|    |                    |   |   | P4 | 51321  | 27312  | 0.32608696 | 0.67391304 | 16735.109 | 18405.913 | 0.90922459 | <b>R</b> |       |
| 68 | Egypt              | 3 | 5 | P1 | 69093  | 9120   | 0.5        | 0.5        | 34546.5   | 4560      | 7.57598684 | <b>L</b> | Mixed |
|    |                    |   |   | P2 | 34864  | 64069  | 0.50549451 | 0.49450549 | 17623.56  | 31682.473 | 0.55625584 | <b>R</b> |       |
|    |                    |   |   | P3 | 25421  | 35098  | 0.49180328 | 0.50819672 | 12502.131 | 17836.689 | 0.70092221 | <b>R</b> |       |
|    |                    |   |   | P4 | 18632  | 2980   | 0.32608696 | 0.67391304 | 6075.6522 | 2008.2609 | 3.02533016 | <b>L</b> |       |
|    |                    |   |   | P5 | 20262  | 26493  | 0.65217391 | 0.34782609 | 13214.348 | 9214.9565 | 1.43401087 | <b>L</b> |       |

|    |           |   |   |    |        |        |            |            |           |           |            |          |       |
|----|-----------|---|---|----|--------|--------|------------|------------|-----------|-----------|------------|----------|-------|
| 69 | Ireland   | 1 | 3 | P1 | 35983  | 11088  | 0.85981308 | 0.14018692 | 30938.654 | 1554.3925 | 19.9040164 | <b>L</b> | Mixed |
|    |           |   |   | P2 | 124003 | 65496  | 0.34065934 | 0.65934066 | 42242.78  | 43184.176 | 0.97820045 | <b>R</b> |       |
|    |           |   |   | P3 | 38933  | 51471  | 0.66304348 | 0.33695652 | 25814.272 | 17343.489 | 1.48841283 | <b>L</b> |       |
| 70 | Sri Lanka | 1 | 2 | P1 | 78218  | 122448 | 0.33695652 | 0.66304348 | 26356.065 | 81188.348 | 0.32462867 | <b>R</b> | Right |
|    |           |   |   | P2 | 131490 | 277371 | 0.25409836 | 0.74590164 | 33411.393 | 206891.48 | 0.16149236 | <b>R</b> |       |
| 71 | Lithuania | 2 | 3 | P1 | 127140 | 74164  | 0.40397351 | 0.59602649 | 51361.192 | 44203.709 | 1.16192043 | <b>L</b> | Mixed |
|    |           |   |   | P2 | 58264  | 8435   | 0.39869281 | 0.60130719 | 23229.438 | 5072.0261 | 4.57991289 | <b>L</b> |       |
|    |           |   |   | P3 | 125897 | 107177 | 0.39869281 | 0.60130719 | 50194.229 | 64446.301 | 0.77885353 | <b>R</b> |       |
| 72 | Honduras  | 1 | 4 | P1 | 15886  | 19988  | 0.74796748 | 0.25203252 | 11882.211 | 5037.626  | 2.35869263 | <b>L</b> | Mixed |
|    |           |   |   | P2 | 24939  | 67216  | 0.60927152 | 0.39072848 | 15194.623 | 26263.205 | 0.57855172 | <b>R</b> |       |
|    |           |   |   | P3 | 23290  | 25894  | 0.32608696 | 0.67391304 | 7594.5652 | 17450.304 | 0.43521105 | <b>R</b> |       |
|    |           |   |   | P4 | 100530 | 40645  | 0.28504673 | 0.71495327 | 28655.748 | 29059.276 | 0.98611362 | <b>R</b> |       |
| 73 | Ethiopia  | 2 | 2 | P1 | 27013  | 72133  | 0.13475177 | 0.86524823 | 3640.0496 | 62412.95  | 0.05832202 | <b>R</b> | Right |
|    |           |   |   | P2 | 82325  | 69585  | 0.4245283  | 0.5754717  | 34949.292 | 40044.198 | 0.87276794 | <b>R</b> |       |
| 74 | Bahrain   | 2 | 2 | P1 | 96086  | 32009  | 0.5        | 0.5        | 48043     | 16004.5   | 3.00184323 | <b>L</b> | Left  |
|    |           |   |   | P2 | 2517   | 2633   | 0.66304348 | 0.33695652 | 1668.8804 | 887.20652 | 1.88105068 | <b>L</b> |       |
| 75 | Cuba      | 1 | 3 | P1 | 2095   | 1241   | 0.65555556 | 0.34444444 | 1373.3889 | 427.45556 | 3.21293962 | <b>L</b> | Mixed |
|    |           |   |   | P2 | 13786  | 492832 | 0.7398374  | 0.2601626  | 10199.398 | 128216.46 | 0.07954828 | <b>R</b> |       |
|    |           |   |   | P3 | 74573  | 13242  | 0.98913043 | 0.01086957 | 73762.424 | 143.93478 | 512.471152 | <b>L</b> |       |
| 76 | Slovenia  | 2 | 3 | P1 | 132166 | 49129  | 0.60927152 | 0.39072848 | 80524.98  | 19196.099 | 4.19486161 | <b>L</b> | Mixed |
|    |           |   |   | P2 | 24690  | 18923  | 0.19607843 | 0.80392157 | 4841.1765 | 15212.608 | 0.31823449 | <b>R</b> |       |
|    |           |   |   | P3 | 161683 | 39537  | 0.59477124 | 0.40522876 | 96164.399 | 16021.529 | 6.00219843 | <b>L</b> |       |
| 77 | Moldova   | 2 | 3 | P1 | 91776  | 14986  | 0.74796748 | 0.25203252 | 68645.463 | 3776.9593 | 18.1747954 | <b>L</b> | Left  |
|    |           |   |   | P2 | 70437  | 26493  | 0.32596685 | 0.67403315 | 22960.127 | 17857.16  | 1.28576587 | <b>L</b> |       |
|    |           |   |   | P3 | 81034  | 37590  | 0.5        | 0.5        | 40517     | 18795     | 2.15573291 | <b>L</b> |       |
| 78 | Armenia   | 4 | 2 | P1 | 32247  | 82245  | 0.13043478 | 0.86956522 | 4206.1304 | 71517.391 | 0.05881269 | <b>R</b> | Right |
|    |           |   |   | P2 | 20581  | 32456  | 0.16847826 | 0.83152174 | 3467.4511 | 26987.87  | 0.12848184 | <b>R</b> |       |
| 79 | Qatar     | 2 | 4 | P1 | 39178  | 29672  | 0.24590164 | 0.75409836 | 9633.9344 | 22375.607 | 0.43055523 | <b>R</b> | Mixed |

|    |                        |   |   |    |        |       |            |            |           |           |            |          |       |
|----|------------------------|---|---|----|--------|-------|------------|------------|-----------|-----------|------------|----------|-------|
|    |                        |   |   | P2 | 6796   | 11278 | 0.33695652 | 0.66304348 | 2289.9565 | 7477.8043 | 0.30623381 | <b>R</b> |       |
|    |                        |   |   | P3 | 73624  | 8781  | 0.62139918 | 0.37860082 | 45749.893 | 3324.4938 | 13.7614613 | <b>L</b> |       |
|    |                        |   |   | P4 | 10404  | 6804  | 0.20261438 | 0.79738562 | 2108      | 5425.4118 | 0.38854194 | <b>R</b> |       |
| 80 | Libya                  | 2 | 3 | P1 | 26570  | 39182 | 0.33695652 | 0.66304348 | 8952.9348 | 25979.37  | 0.34461709 | <b>R</b> | Mixed |
|    |                        |   |   | P2 | 77231  | 15966 | 0.66298343 | 0.33701657 | 51202.873 | 5380.8066 | 9.51583591 | <b>L</b> |       |
|    |                        |   |   | P3 | 55640  | 59858 | 0.5        | 0.5        | 27820     | 29929     | 0.92953323 | <b>R</b> |       |
| 81 | Afghanistan            | 2 | 2 | P1 | 91500  | 6697  | 0.85377358 | 0.14622642 | 78120.283 | 979.2783  | 79.7733217 | <b>L</b> | Left  |
|    |                        |   |   | P2 | 91440  | 10883 | 0.69281046 | 0.30718954 | 63350.588 | 3343.1438 | 18.9494058 | <b>L</b> |       |
| 82 | Albania                | 2 | 3 | P1 | 17990  | 7364  | 0.25619835 | 0.74380165 | 4609.0083 | 5477.3554 | 0.84146599 | <b>R</b> | Mixed |
|    |                        |   |   | P2 | 13866  | 38913 | 0.51219512 | 0.48780488 | 7102.0976 | 18981.951 | 0.37415003 | <b>R</b> |       |
|    |                        |   |   | P3 | 14645  | 8954  | 0.49180328 | 0.50819672 | 7202.459  | 4550.3934 | 1.58282116 | <b>L</b> |       |
| 83 | Algeria                | 3 | 4 | P1 | 16411  | 7729  | 0.5        | 0.5        | 8205.5    | 3864.5    | 2.12330185 | <b>L</b> | Mixed |
|    |                        |   |   | P2 | 5753   | 4100  | 0.47457627 | 0.52542373 | 2730.2373 | 2154.2373 | 1.26738002 | <b>L</b> |       |
|    |                        |   |   | P3 | 4916   | 17518 | 0.32967033 | 0.67032967 | 1620.6593 | 11742.835 | 0.13801261 | <b>R</b> |       |
|    |                        |   |   | P4 | 31766  | 24688 | 0.5        | 0.5        | 15883     | 12344     | 1.28669799 | <b>L</b> |       |
| 84 | Belize                 | 2 | 2 | P1 | 6814   | 141   | 0.92907801 | 0.07092199 | 6330.7376 | 10        | 633.073759 | <b>L</b> | Left  |
|    |                        |   |   | P2 | 13989  | 5269  | 0.31304348 | 0.68695652 | 4379.1652 | 3619.5739 | 1.20985655 | <b>L</b> |       |
| 85 | Bosnia and Herzegovina | 3 | 4 | P1 | 37811  | 43078 | 0.25       | 0.75       | 9452.75   | 32308.5   | 0.2925778  | <b>L</b> | Mixed |
|    |                        |   |   | P2 | 38647  | 36029 | 0.85620915 | 0.14379085 | 33089.915 | 5180.6405 | 6.38722469 | <b>L</b> |       |
|    |                        |   |   | P3 | 29120  | 17983 | 0.66304348 | 0.33695652 | 19307.826 | 6059.4891 | 3.18637853 | <b>R</b> |       |
|    |                        |   |   | P4 | 22307  | 14611 | 0.49180328 | 0.50819672 | 10970.656 | 7425.2623 | 1.4774772  | <b>L</b> |       |
| 86 | Botswana               | 1 | 2 | P1 | 33206  | 7086  | 0.83425414 | 0.16574586 | 27702.243 | 1174.4751 | 23.5869132 | <b>L</b> | Left  |
|    |                        |   |   | P2 | 109993 | 29667 | 0.66847826 | 0.33152174 | 73527.929 | 9835.2554 | 7.47595523 | <b>L</b> |       |
| 87 | Cambodia               | 1 | 1 | P1 | 26858  | 15812 | 0.5        | 0.5        | 13429     | 7906      | 1.69858335 | <b>L</b> | Left  |
| 88 | Cameroon               | 1 | 3 | P1 | 4663   | 9201  | 0.11510791 | 0.88489209 | 536.7482  | 8141.8921 | 0.06592426 | <b>R</b> | Mixed |
|    |                        |   |   | P2 | 2652   | 1832  | 0.47540984 | 0.52459016 | 1260.7869 | 961.04918 | 1.31188592 | <b>L</b> |       |
|    |                        |   |   | P3 | 45973  | 9814  | 0.56603774 | 0.43396226 | 26022.453 | 4258.9057 | 6.11012662 | <b>L</b> |       |

|     |                   |   |          |    |       |       |            |            |           |           |            |   |       |
|-----|-------------------|---|----------|----|-------|-------|------------|------------|-----------|-----------|------------|---|-------|
| 89  | China             | 1 | 1        | P1 | 69471 | 2304  | 0.11764706 | 0.88235294 | 8173.0588 | 2032.9412 | 4.0203125  | L | Left  |
| 90  | <b>Cyprus</b>     | 3 | 0        |    |       |       |            |            |           |           |            |   |       |
| 91  | El Salvador       | 2 | 1        | P1 | 17728 | 17393 | 0.57009346 | 0.42990654 | 10106.617 | 7477.3645 | 1.35162822 | L | Left  |
| 92  | Equatorial Guinea | 1 | 2        | P1 | 2820  | 267   | 0.24590164 | 0.75409836 | 693.44262 | 201.34426 | 3.44406448 | L | Left  |
|     |                   |   |          | P2 | 3441  | 351   | 0.69736842 | 0.30263158 | 2399.6447 | 106.22368 | 22.5904868 | L |       |
| 93  | Estonia           | 2 | 2        | P1 | 62216 | 24640 | 0.33149171 | 0.66850829 | 20624.088 | 16472.044 | 1.25206612 | L | Left  |
|     |                   |   |          | P2 | 91520 | 16373 | 0.66847826 | 0.33152174 | 61179.13  | 5428.0054 | 11.271015  | L |       |
| 94  | Eswatini          | 3 | 1        | P1 | 1082  | 137   | 0.40425532 | 0.59574468 | 437.40426 | 81.617021 | 5.35922836 | L | Left  |
| 95  | <b>Fiji</b>       | 1 | <b>0</b> |    |       |       |            |            |           |           |            |   |       |
| 96  | Ghana             | 3 | 3        | P1 | 17760 | 12554 | 0.25203252 | 0.74796748 | 4476.0976 | 9389.9837 | 0.47668853 | R | Mixed |
|     |                   |   |          | P2 | 3612  | 3104  | 0.49180328 | 0.50819672 | 1776.3934 | 1577.4426 | 1.12612238 | L |       |
|     |                   |   |          | P3 | 12239 | 26888 | 0.17032967 | 0.82967033 | 2084.6648 | 22308.176 | 0.09344847 | R |       |
| 97  | Kenya             | 4 | 3        | P1 | 37474 | 17155 | 0.32608696 | 0.67391304 | 12219.783 | 11560.978 | 1.05698517 | L | Mixed |
|     |                   |   |          | P2 | 33285 | 36677 | 0.65555556 | 0.34444444 | 21820.167 | 12633.189 | 1.72720972 | R |       |
|     |                   |   |          | P3 | 65128 | 19225 | 0.66666667 | 0.33333333 | 43418.667 | 6408.3333 | 6.7753446  | L |       |
| 98  | Kyrgyzstan        | 3 | 3        | P1 | 22704 | 10864 | 0.18666667 | 0.81333333 | 4238.08   | 8836.0533 | 0.47963495 | R | Mixed |
|     |                   |   |          | P2 | 26509 | 13073 | 0.40397351 | 0.59602649 | 10708.934 | 7791.8543 | 1.37437552 | L |       |
|     |                   |   |          | P3 | 38752 | 37889 | 0.66304348 | 0.33695652 | 25694.261 | 12766.946 | 2.01256131 | L |       |
| 99  | Latvia            | 2 | 3        | P1 | 14432 | 61459 | 0.1509434  | 0.8490566  | 2178.4151 | 52182.17  | 0.04174635 | R | Mixed |
|     |                   |   |          | P2 | 30836 | 5664  | 0.39215686 | 0.60784314 | 12092.549 | 3442.8235 | 3.51239293 | L |       |
|     |                   |   |          | P3 | 80276 | 55132 | 0.39215686 | 0.60784314 | 31480.784 | 33511.608 | 0.9393994  | R |       |
| 100 | Luxembourg        | 1 | 3        | P1 | 4283  | 29281 | 0.32608696 | 0.67391304 | 1396.6304 | 19732.848 | 0.07077693 | R | Right |
|     |                   |   |          | P2 | 11254 | 9145  | 0.32596685 | 0.67403315 | 3668.4309 | 6164.0331 | 0.59513485 | R |       |
|     |                   |   |          | P3 | 1890  | 2459  | 0.5        | 0.5        | 945       | 1229.5    | 0.76860512 | R |       |
| 101 | Madagascar        | 2 | 2        | P1 | 16859 | 5915  | 0.24590164 | 0.75409836 | 4145.6557 | 4460.4918 | 0.92941674 | R | Mixed |
|     |                   |   |          | P2 | 728   | 704   | 0.49180328 | 0.50819672 | 358.03279 | 357.77049 | 1.00073314 | L |       |
| 102 | Malawi            | 2 | 2        | P1 | 13972 | 10375 | 0.12408759 | 0.87591241 | 1733.7518 | 9087.5912 | 0.19078233 | R | Mixed |

|     |                 |   |   |    |        |        |            |            |           |           |            |          |       |
|-----|-----------------|---|---|----|--------|--------|------------|------------|-----------|-----------|------------|----------|-------|
|     |                 |   |   | P2 | 18009  | 8147   | 0.70114943 | 0.29885057 | 12627     | 2434.7356 | 5.18618935 | <b>L</b> |       |
| 103 | Maldives        | 1 | 1 | P1 | 29672  | 13036  | 0.20175439 | 0.79824561 | 5986.4561 | 10405.93  | 0.57529276 | <b>R</b> | Right |
| 104 | Mongolia        | 1 | 2 | P1 | 27687  | 21154  | 0.46551724 | 0.53448276 | 12888.776 | 11306.448 | 1.13994913 | <b>L</b> | Left  |
|     |                 |   |   | P2 | 105716 | 49665  | 0.65217391 | 0.34782609 | 68945.217 | 17274.783 | 3.99109031 | <b>L</b> |       |
| 105 | Mozambique      | 2 | 1 | P1 | 31080  | 11445  | 0.09090909 | 0.90909091 | 2825.4545 | 10404.545 | 0.27155963 | <b>R</b> | Right |
| 106 | Myanmar         | 2 | 2 | P1 | 111257 | 18187  | 0.20529801 | 0.79470199 | 22840.841 | 14453.245 | 1.58032615 | <b>L</b> | Left  |
|     |                 |   |   | P2 | 155556 | 100097 | 0.79738562 | 0.20261438 | 124038.12 | 20281.092 | 6.11594882 | <b>L</b> |       |
| 107 | Namibia         | 1 | 1 | P1 | 29588  | 29005  | 0.12068966 | 0.87931034 | 3570.9655 | 25504.397 | 0.14001372 | <b>R</b> | Right |
| 108 | Nigeria         | 3 | 2 | P1 | 80595  | 10861  | 0.23333333 | 0.76666667 | 18805.5   | 8326.7667 | 2.25843965 | <b>L</b> | Left  |
|     |                 |   |   | P2 | 25913  | 21787  | 0.49726776 | 0.50273224 | 12885.699 | 10953.027 | 1.17645095 | <b>L</b> |       |
| 109 | North Macedonia | 2 | 4 | P1 | 52841  | 19458  | 0.50833333 | 0.49166667 | 26860.842 | 9566.85   | 2.80769968 | <b>L</b> | Left  |
|     |                 | 1 |   | P2 | 49580  | 3317   | 0.39869281 | 0.60130719 | 19767.19  | 1994.5359 | 9.91067098 | <b>L</b> |       |
|     |                 |   |   | P3 | 20810  | 26058  | 0.5754717  | 0.4245283  | 11975.566 | 11062.358 | 1.08255089 | <b>L</b> |       |
|     |                 |   |   | P4 | 13033  | 8549   | 0.90196078 | 0.09803922 | 11755.255 | 838.13725 | 14.0254533 | <b>L</b> |       |
| 110 | Norway          | 1 | 4 | P1 | 7716   | 13417  | 0.31111111 | 0.68888889 | 2400.5333 | 9242.8222 | 0.25971865 | <b>R</b> | Mixed |
|     |                 |   |   | P2 | 13399  | 8040   | 0.52542373 | 0.47457627 | 7040.1525 | 3815.5932 | 1.84510039 | <b>L</b> |       |
|     |                 |   |   | P3 | 25073  | 35237  | 0.20261438 | 0.79738562 | 5080.1503 | 28097.477 | 0.1808045  | <b>R</b> |       |
|     |                 |   |   | P4 | 51804  | 17849  | 0.33695652 | 0.66304348 | 17455.696 | 11834.663 | 1.47496347 | <b>L</b> |       |
| 111 | Rwanda          | 2 | 1 | P1 | 9890   | 2832   | 0.98901099 | 0.01098901 | 9781.3187 | 31.120879 | 314.300847 | <b>L</b> |       |
| 112 | South Korea     | 1 | 4 | P1 | 36772  | 25131  | 0.20529801 | 0.79470199 | 7549.2185 | 19971.656 | 0.37799663 | <b>R</b> | Mixed |
|     |                 |   |   | P2 | 18995  | 18165  | 0.24590164 | 0.75409836 | 4670.9016 | 13698.197 | 0.34098661 | <b>R</b> |       |
|     |                 |   |   | P3 | 58988  | 53658  | 0.74796748 | 0.25203252 | 44121.106 | 13523.561 | 3.26253609 | <b>L</b> |       |
|     |                 |   |   | P4 | 60328  | 52613  | 0.49180328 | 0.50819672 | 29669.508 | 26737.754 | 1.10964848 | <b>L</b> |       |
| 113 | Senegal         | 2 | 0 |    |        |        |            |            |           |           |            |          |       |
| 114 | Seychelles      | 1 | 0 |    |        |        |            |            |           |           |            |          |       |
| 115 | Singapore       | 2 | 5 | P1 | 9581   | 36036  | 0.10784314 | 0.89215686 | 1033.2451 | 32149.765 | 0.0321385  | <b>R</b> | Mixed |
|     |                 |   |   | P2 | 4607   | 1203   | 0.34408602 | 0.65591398 | 1585.2043 | 789.06452 | 2.00896665 | <b>L</b> |       |



|     |          |   |   |    |        |        |            |            |           |           |            |          |       |
|-----|----------|---|---|----|--------|--------|------------|------------|-----------|-----------|------------|----------|-------|
|     |          |   |   | P3 | 1521   | 845    | 0.60927152 | 0.39072848 | 926.70199 | 330.16556 | 2.80677966 | <b>L</b> |       |
|     |          |   |   | P4 | 764    | 1434   | 0.32967033 | 0.67032967 | 251.86813 | 961.25275 | 0.26202071 | <b>R</b> |       |
|     |          |   |   | P5 | 2402   | 2639   | 0.48387097 | 0.51612903 | 1162.2581 | 1362.0645 | 0.85330618 | <b>R</b> |       |
| 116 | Sudan    | 2 | 2 | P1 | 3597   | 3194   | 0.45856354 | 0.54143646 | 1649.453  | 1729.3481 | 0.95380049 | <b>L</b> | Mixed |
|     |          |   |   | P2 | 571    | 574    | 0.43396226 | 0.56603774 | 247.79245 | 324.90566 | 0.7626597  | <b>R</b> |       |
| 117 | Uganda   | 2 | 2 | P1 | 12016  | 5651   | 0.39333333 | 0.60666667 | 4726.2933 | 3428.2733 | 1.37862209 | <b>R</b> | Mixed |
|     |          |   |   | P2 | 39110  | 13950  | 0.74485597 | 0.25514403 | 29131.317 | 3559.2593 | 8.18465719 | <b>L</b> |       |
| 118 | Vietnam  | 1 | 2 | P1 | 312036 | 459026 | 0.67391304 | 0.32608696 | 210285.13 | 149682.39 | 1.40487554 | <b>L</b> | Mixed |
|     |          | 2 |   | P2 | 316960 | 456792 | 0.49180328 | 0.50819672 | 155881.97 | 232140.2  | 0.67149925 | <b>R</b> |       |
| 119 | Zambia   | 2 | 2 | P1 | 29920  | 37369  | 0.32608696 | 0.67391304 | 9756.5217 | 25183.457 | 0.3874179  | <b>R</b> | Mixed |
|     |          |   |   | P2 | 63362  | 40868  | 0.70754717 | 0.29245283 | 44831.604 | 11951.962 | 3.75098271 | <b>L</b> |       |
| 120 | Zimbabwe | 2 | 2 | P1 | 17559  | 3494   | 0.31395349 | 0.68604651 | 5512.7093 | 2397.0465 | 2.29979238 | <b>L</b> | Left  |
|     |          |   |   | P2 | 69899  | 98688  | 0.5        | 0.5        | 34949.5   | 49344     | 0.70828267 | <b>L</b> |       |
